# Detection of allele-specific expression in spatial transcriptomics with spASE

Luli S. Zou<sup>1,2,3</sup>, Tongtong Zhao<sup>2</sup>, Dylan M. Cable<sup>2,3,4</sup>, Evan Murray<sup>2</sup>, Martin J. Aryee<sup>1,2,5</sup>, Fei Chen<sup>2,†</sup>, Rafael A. Irizarry<sup>1,3,†</sup>

<sup>1</sup> Department of Biostatistics, Harvard University, Boston, MA, 02115

<sup>2</sup> Broad Institute of Harvard and MIT, Cambridge, MA, 02142

<sup>3</sup> Department of Data Science, Dana-Farber Cancer Institute, Boston, MA, 02215

<sup>4</sup> Department of Electrical Engineering and Computer Science, MIT, Cambridge, MA, 02139

<sup>5</sup> Department of Pathology, Massachusetts General Hospital and Harvard Medical School, Boston, MA 02114

† These authors contributed equally

## Abstract

Allele-specific expression (ASE), or the preferential expression of one allele, can be observed in transcriptomics data from early development throughout the lifespan. However, the prevalence of spatial and cell type-specific ASE variation remains unclear. Spatial transcriptomics technologies permit the study of spatial ASE patterns genome-wide at near-single-cell resolution. However, the data are highly sparse, and confounding between cell type and spatial location present further statistical challenges. Here, we introduce spASE (<https://github.com/lulizou/spase>), a computational framework for detecting spatial patterns in ASE within and across cell types from spatial transcriptomics data. To tackle the challenge presented by the low signal to noise ratio due to the sparsity of the data, we implement a spatial smoothing approach that greatly improves statistical power. We generated Slide-seqV2 data from the mouse hippocampus and detected ASE in X-chromosome genes, both within and across cell type, validating our ability to recover known ASE patterns. We demonstrate that our method can also identify cell type-specific effects, which we find can explain the majority of the spatial signal for autosomal genes. The findings facilitated by our method provide new insight into the uncharacterized landscape of spatial and cell type-specific ASE in the mouse hippocampus.

## Introduction

In diploid organisms, allele-specific expression (ASE) refers to the imbalanced expression of the two parental alleles for a given gene. ASE has been well-studied in the context of epigenetic phenomena such as genomic imprinting and X-chromosome inactivation (XCI) [1, 2, 3], where expression from one allele is silenced. Spatial patterns of ASE have long been observed as a consequence of XCI in female organisms, where the random silencing of either the maternal or paternal X-chromosome in early development is passed to daughter cells, resulting in visible clusters of ASE [4, 5, 6]. By contrast, although studies in bulk and single-cell RNA-sequencing data have revealed widespread variability in ASE throughout the autosome across tissues and cell types [7, 8, 9, 10, 11, 12, 13, 14, 15, 16, 17, 18, 19, 20], relatively little is known about the prevalence of spatial ASE therein.

31 Spatial transcriptomics technologies now provide the opportunity to study spatial  
32 ASE patterns genome-wide. For example, Slide-seqV2 [21, 22] has high resolution  
33 which enables near-single-cell quantification of ASE with 2D spatial information.  
34 However, these data are limited by highly sparse read counts in comparison to  
35 bulk or single-cell sequencing technologies, which is further exacerbated by the  
36 requirement that reads align uniquely to one allele. In addition, cell type, which  
37 drives the majority of variability observed in single-cell data, is highly correlated  
38 with spatial location, especially in solid tissue [23]. Therefore, it is important to  
39 distinguish between spatial and cell type-specific ASE, which could arise from and  
40 contribute to distinct underlying biological mechanisms.

41 Several statistical and computational methods have been developed for studying  
42 ASE in bulk and single-cell RNA-seq data [24, 25, 26, 27, 28, 29, 30, 31]. Some fo-  
43 cus on estimating allele-specific transcriptional bursting kinetics for individual genes  
44 in homogeneous populations of cells [15, 30, 31]. Here, we instead focus on the  
45 problem of estimation and inference for the maternal allele probability  $p$  for a given  
46 gene across 2D space, and we consider how  $p$  may vary with cell type. To model  
47  $p$  in bulk and single-cell RNA-seq, multiple methods have used a beta-binomial  
48 framework, which can flexibly account for overdispersion from unknown technical  
49 and biological variability [26, 27, 28]. An additional advantage of this model is that  
50 it can be parameterized as a generalized linear model (GLM) [32, 33], allowing for  
51 maximum likelihood estimation of  $p$  while incorporating covariates of interest such  
52 as cell type.

53 The issue of estimating smooth functions from sparsely sampled data has been  
54 well-studied [34, 35, 36, 37, 38], and multiple solutions have been developed and  
55 implemented as computational methods [39, 40]. In the case of allele-specific spa-  
56 tial transcriptomics data, although the read count measured at individual spatial  
57 coordinates may be low, smoothing spline methods can increase power by lever-  
58 aging information from local neighborhoods of pixels. Generalized additive models  
59 are GLMs that incorporate smoothing splines into a regression framework, enabling  
60 estimation of the smooth spatial function as well as hypothesis testing for spatial  
61 functions deviating from a constant [38, 40].

62 Here, we present spASE, a computational framework for detecting genes with  
63 significant ASE patterns in spatial transcriptomics data. We employ a hierarchical  
64 beta-binomial smoothing approach based on thin plate regression splines [36, 41] to  
65 estimate 2D allele probability functions and detect spatially significant genes. Given  
66 the high correlation between cell type and spatial location in solid tissue, our method  
67 permits control for cell type effects as well as any other potential covariates of in-  
68 terest. Through simulations, we confirm the power and false positive rate control of  
69 our method even in highly sparse settings such as those observed in allele-resolved  
70 spatial transcriptomics. Additionally, we generate allele-specific Slide-seqV2 data  
71 from the hippocampus of an F1 hybrid mouse and find that we are able to recover  
72 known patterns of ASE due to XCI in highly-expressed X-chromosome genes, both  
73 within and across cell types. We further show that our method can detect cell type-  
74 specific ASE, which we find can explain most of the spatial signal observed in au-  
75 tosomal genes such as *Ptgds*. Overall, we report new insights into the uncharac-  
76 terized landscape of spatial and cell type-specific ASE in the mouse hippocampus,  
77 thus demonstrating the utility of spASE for detecting known and novel patterns of  
78 ASE in spatial transcriptomics.

## 79 Results

### 80 A beta-binomial framework for modeling allele-specific spatial 81 transcriptomics

82 A statistical challenge for allele-specific spatial transcriptomics is that spatial and  
83 cell type effects can be confounded (Figure 1a,b). We therefore developed a com-  
84 putational framework that can account for both these sources of variability. Specif-  
85 ically, we developed a beta-binomial GLM that provides a flexible approach to esti-  
86 mation, inference, and visualization of ASE in spatial transcriptomics. We denoted  
87 the counts from the maternal allele for gene  $g$  and pixel  $i$  with  $Y_{gi}$  and assumed it  
88 followed the distribution:

$$Y_{gi} \mid \lambda_{gi} \sim \text{Binomial}(n_{gi}, \lambda_{gi}),$$

89 with  $n_{gi}$  the observed total UMI count for gene  $g$  and pixel  $i$ , summing both alleles,  
90 and  $\lambda_{gi}$  the probability that a transcript from gene  $g$  is from the maternal allele. We  
91 assumed that  $\lambda_{gi}$  follows a beta distribution with mean  $p_{gi}$  and variance  $\phi_g p_{gi}(1-p_{gi})$ .  
92 Here,  $p_{gi}$  is the mean maternal allele probability and  $\phi_g$  is a gene-specific overdis-  
93 persion parameter ranging from 0 to 1 that accounts for biological and technical  
94 variability not explained by binomial sampling.

95 To account for spatial and cell type effects, we created a logit-linear GLM,

$$\text{logit}(p_{gi}) = \beta_{g0} + f(x_i, y_i) + \sum_{k=1}^K \beta_{gk} X_{ik}, \quad (1)$$

96 with  $x_i$  and  $y_i$  the spatial location of pixel  $i$ ,  $f(x_i, y_i)$  a smooth function of location,  
97 the  $X_{ik}$ 's indicator functions equal to 1 if pixel  $i$  is from cell type  $k$ , and the  $\beta_{gk}$   
98 parameters representing gene-specific cell type effects. Note that the  $\beta_{gk}$  can be  
99 interpreted as the change in log-odds, compared to the reference cell type, of a  
100 maternal allele transcript in gene  $g$  and cell type  $k$ .

101 The spatial effect function was modeled as a thin plate spline [36] defined by

$$f(x_i, y_i) = \sum_j^J \theta_{gj} B_j(x_i, y_i),$$

102 with  $B_j(x, y)$  the smooth basis function for the spline and  $\theta_{gj}$  the gene-specific pa-  
103 rameters that define gene-specific spatial effects. With this definition of  $f$ , all the  
104 terms in (1) are linear and define a GLM. We can therefore obtain maximum likeli-  
105 hood estimates (MLEs), standard errors, and confidence intervals for all parameters  
106 using GLM theory and software. Furthermore, we can test for spatial effects by per-  
107 forming a likelihood ratio test comparing the model with  $f$  to a model without space  
108 (see Methods for details).

109 In addition to fitting spatial ASE across all cell types, we can also fit a cell type-  
110 specific version of model (1) as

$$\text{logit}(p_{gik}) = \gamma_{g0k} + f_k(x_i, y_i),$$

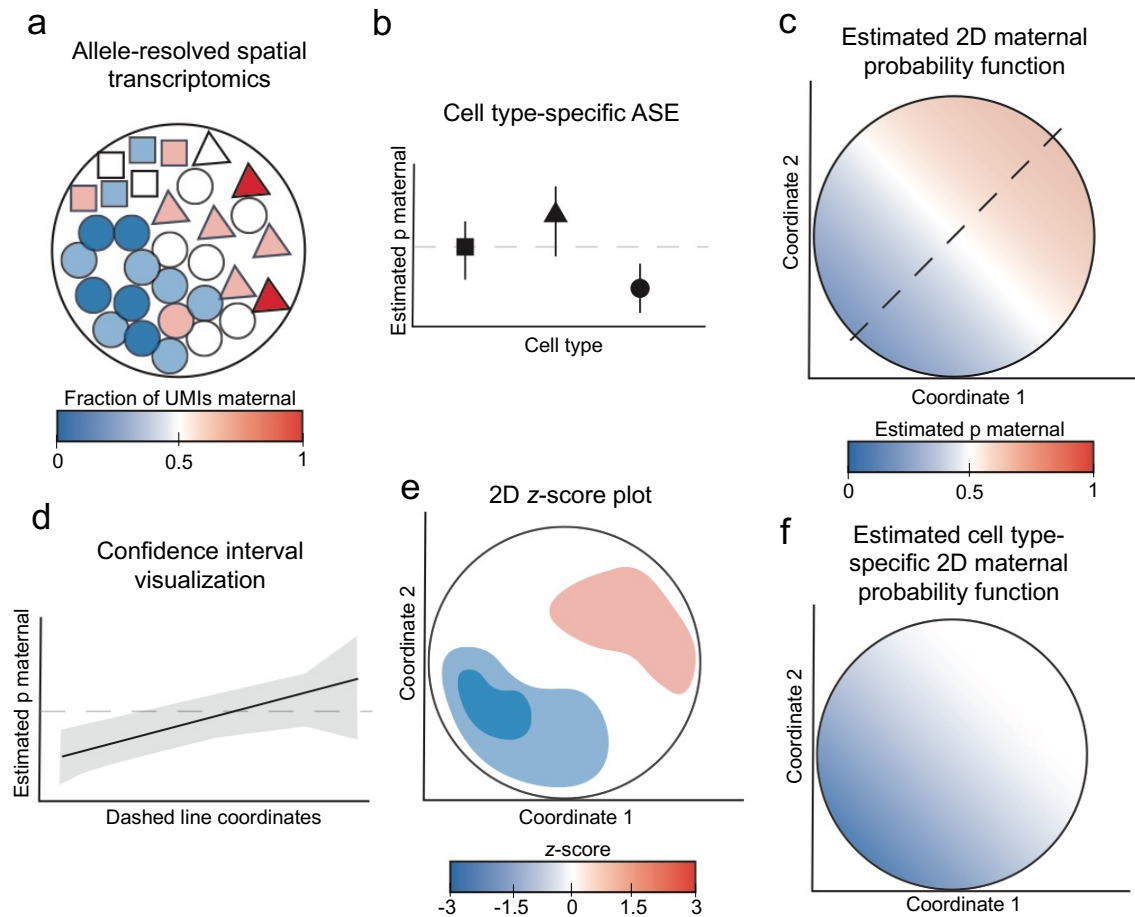

**Figure 1: Schematic of detecting allele-specific expression in spatial transcriptomics using spASE.** (a) Input is allele- and cell type-resolved spatial transcriptomics with UMIs. Each shape represents a different cell type, and the color indicates the fraction of observed UMIs that were from the maternal allele. (b) Point estimates and confidence intervals for the estimated maternal allele probability (estimated  $p$  maternal) for each cell type. (c) Visualization of the estimated maternal probability function, not controlling for cell type. (d) Visualization of confidence intervals (gray shaded region) around the MLE in a 1D cross-section. The solid line indicates the estimated maternal probability along the black dashed line from c. Light gray dashed line indicates the null of  $p = 0.5$ . (e) 2D z-score plot visualizing region-level significance of the estimated function from c. (f) Estimated cell type-specific function for the circle cell type from a.

111 for all pixels  $i$  belonging to cell type  $k$ , where  $p$  and  $f$  have been modified to depend  
112 on cell type. Note that only certain genes within certain cell types provide enough  
113 counts and therefore power to fit our cell type-specific spatial model.

114 After estimating parameters by maximum likelihood for each gene, we can visu-  
115 alize the smooth maternal probability function across 2D coordinates (Figure 1c),  
116 and for any given spatial cross-section, we can additionally visualize confidence  
117 intervals (Figure 1d). Region-specific significance can also be assessed using 2D  
118 z-score maps (Figure 1e). Running spASE on individual cell types generates spatial  
119 ASE maps for cell type-specific estimation (Figure 1f). spASE uses the likelihood  
120 ratio to rank genes according to spatial effects variability.

121 To evaluate the performance of our method, we generated simulated spatial  
122 transcriptomics data under a wide variety of sparsity and overdispersion conditions  
123 (Supplementary Figure S1, Methods). We calculated the power and false positive  
124 rate, and we computed p-values to detect significant spatial ASE. We observed that  
125 power decreased as overdispersion increased (Supplementary Figure S1a); how-  
126 ever, we found that power is at least 70% even for genes with high overdispersion  
127 ( $\phi = 0.8$ ) and as few as 50 pixels with low UMI coverage (e.g. less than 10 UMIs  
128 per pixel). With at least 100 pixels for a given gene, the power across all scenarios  
129 was at least 85%, even with as low as 1 UMI per pixel. Using a p-value threshold  
130 of  $p \leq 0.01$ , we found that the false positive rate approached the nominal rate of  
131 0.01 as the number of pixels increased, in concordance with the expected asymp-  
132 totic guarantees of our model (Supplementary Figure S1b,c). We also evaluated  
133 confidence interval coverage as a function of sample size and number of UMIs per  
134 pixel (Supplementary Figures S2, S3), and we found that the beta-binomial model  
135 maintained near-95% coverage across all scenarios.

## 136 **spASE identifies spatially-significant ASE genes and smooths** 137 **over sparse allele-specific spatial transcriptomics signal**

138 To test spASE on allele-specific spatial transcriptomics data, we generated Slide-  
139 seqV2 data of an F1 hybrid CAST/EiJ x 129S1/SvImJ (CAST x 129) mouse hip-  
140 pocampus and surrounding region (see Methods). We aligned 150bp reads to a  
141 pooled CASTx129 transcriptome and only considered reads that uniquely aligned to  
142 one allele. We used RCTD [23] to call cell types using a single-cell RNA-sequencing  
143 reference of the mouse hippocampus [42], and we filtered to pixels with a high like-  
144 lihood of sourcing UMIs from a single cell type (Figure 2a). Based on results from  
145 our simulations (Supplementary Figure S1), we filtered genes with non-zero UMI  
146 counts on at least 100 pixels. Using these filtering criteria resulted in 4,140 genes  
147 for downstream analysis, which were expressed on a median of 210 pixels (IQR:  
148 140-384 pixels) with a median number of UMIs per pixel of 1.06 (IQR: 1.04-1.1  
149 UMIs/pixel) (Supplementary Figure S4).

150 We then fit our model with and without the cell type covariates  $X_{ik}$  in the model  
151 (see Methods). We found that, compared to autosomal genes, a higher propor-  
152 tion of X-chromosome genes had likelihood-ratio-test significance (Figure 2b), in  
153 concordance with the expected patterns of XCI in the X-chromosome. The  $p$ -value  
154 distribution for autosomal genes was closer to uniform distribution, indicative of less-  
155 frequent spatial ASE effects. After controlling for cell type, the autosomal distribution  
156 remained similar, while the distribution for the X-chromosome had a lesser skew,

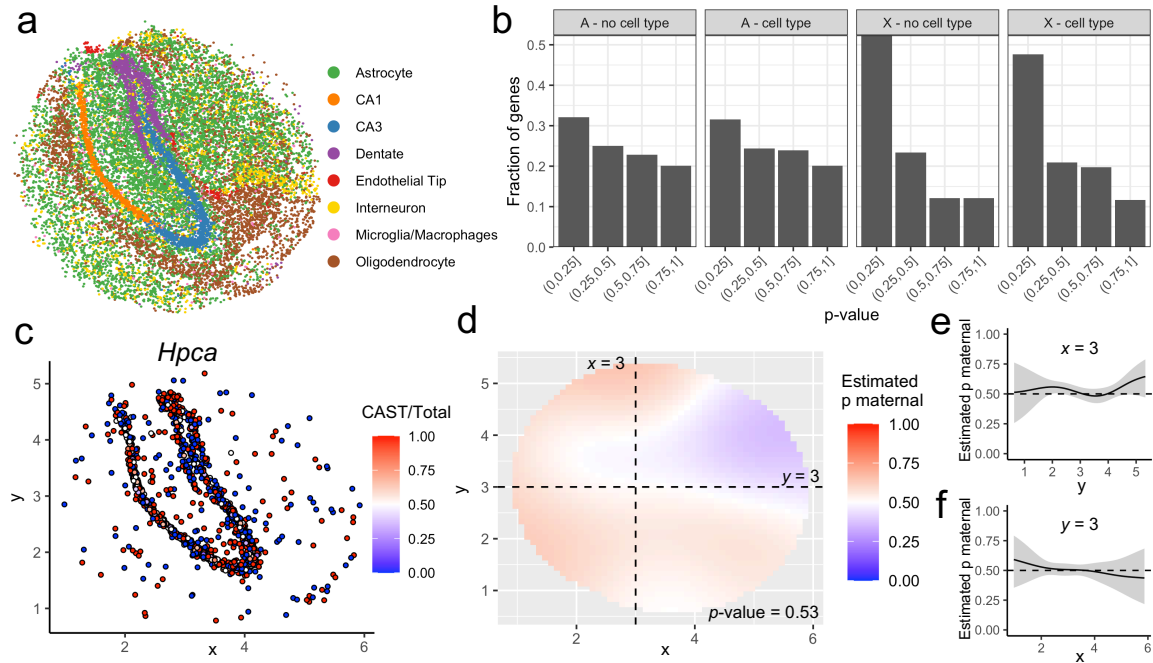

**Figure 2: spASE identifies spatially significant ASE genes and smooths over sparse ASE spatial transcriptomics signal.** (a) Map of cell types identified by RCTD in the Slide-seqV2 data generated in this study. Each point represents a pixel classified as a singlet of that cell type. (b) Distributions of  $p$ -values calculated by spASE for autosomal (A) and X-chromosome (X) genes in the real Slide-seqV2 data, not controlling for cell type ("no cell type") and controlling for cell type ("cell type"). (c) Raw data for *Hpca*, showing higher coverage in the hippocampal formation and sparse coverage in the adjacent regions. (d) Estimated 2D maternal probability function for *Hpca*, with crosshairs indicating the  $x = 3$  and  $y = 3$  lines, along which point estimates and confidence intervals are plotted in (e) and (f), respectively.

157 consistent with some the genes appearing to have spatial effects due to confound-  
 158 ing with cell type effects.

159 Using a false discovery rate (FDR) threshold of  $q \leq 0.01$ , we found ten genes  
 160 with a spatially significant pattern, of which six were from the X-chromosome (Sup-  
 161 plementary Table S1). However, after controlling for cell type, only three genes, two  
 162 (*Tspan7* and *Plp1*) on the X chromosome and one (*Sst*) autosome, were significant.  
 163 Other genes, including *Nrip3* and *Ptgds*, were no longer significant after controlling  
 164 for cell type, indicating that cell type differences were the main driver of spatial ASE  
 165 for these genes.

166 spASE accounts for biological and technical noise to avoid detecting false posi-  
 167 tive ASE. For example, the gene *Hpca* was determined by spASE to not have signifi-  
 168 cant spatial ASE (Figure 2c,d,  $p$ -value = 0.53). Although *Hpca* is highly expressed  
 169 in the hippocampal formation, sparse expression in the adjacent regions resulted in  
 170 noisier estimates and wide confidence intervals outside the hippocampus (Figure  
 171 2e,f). In general, such visualizations enabled by spASE allow for the assessment of  
 172 both overall significance as well as position-specific significance across space.

## 173 spASE detects spatial patterns of XCI across and within cell type 174 in the mouse hippocampus

175 Next, we used spASE to estimate the maternal allele probability function for X-  
 176 chromosome genes and found that the patterns for almost all significant X-chromosome  
 177 genes were similar and anti-correlated with *Xist* expression (Figure 3a-c, Supple-

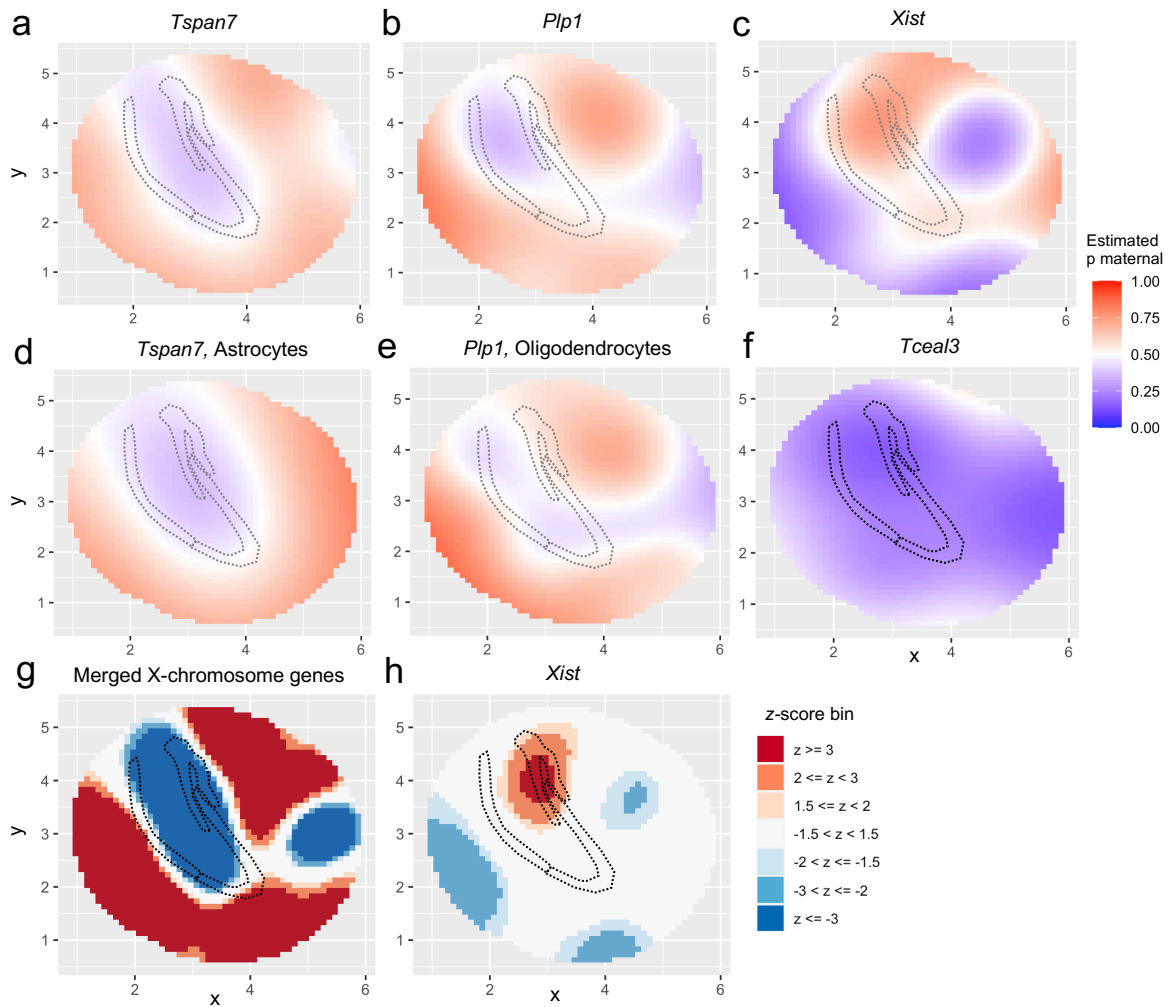

**Figure 3: spASE detects spatial ASE in X-chromosome genes across and within cell type in the mouse hippocampus from Slide-seqV2 data.** (a) Smoothed maternal allele probability functions for X-chromosome genes highly expressed in the mouse hippocampus and detected as significant ( $q$ -value  $\leq 0.01$ ): *Tspan7* and (b) *Plp1*. Red color indicates bias towards maternal, blue towards paternal, and white indicates both maternal and paternal alleles are present. The outline of the CA1, CA3, and dentate cell type regions is depicted in the dotted gray areas for reference. (c) Same as a-b for *Xist*. (d) Same as a-c but only using astrocyte pixels for *Tspan7*. (e) Same as a-c but only using oligodendrocyte pixels for *Plp1*. (f) Same as a-c for *Tceal3*. (g) 2D z-score plot computed from combining all non-*Xist* X-chromosome genes. (h) 2D z-score plot for *Xist*.

178 mentary Figure S5), reflecting the expected mosaicism due to XCI by *Xist*. We also  
 179 found that patterns of XCI were preserved within individual cell types. For exam-  
 180 ple, *Tspan7*, which is relatively highly expressed in astrocytes (Figure 3d, S6), and  
 181 *Plp1*, which is highly expressed in oligodendrocytes (Figure 3e, Supplementary Fig-  
 182 ure S7), were both estimated to have maternal probability functions anti-correlated  
 183 with *Xist*.

184 One X-chromosome gene, *Tceal3*, exhibited a strong paternal skew unlike the  
 185 rest of the X-chromosome (Figure 3f, Supplementary Figure S8). However, the es-  
 186 timated *Tceal3* maternal probability still had a similar trend to the observed XCI  
 187 pattern, with a high paternal bias around the hippocampus and a near-biallelic pat-  
 188 tern in the periphery. We investigated the *Tceal3* locus and found that another  
 189 nearby gene less than 100kb away, *Morf4l2*, also exhibited a strong paternal bias.  
 190 *Tceal6*, a paralog of *Tceal3*, also showed a paternal bias in a similar pattern to that  
 191 of *Tceal3*; however, other genes in the *Tceal* family, such as *Tceal5*, did not show  
 192 the same bias (Supplementary Figure S8).

193 We then constructed a consensus XCI map by combining the UMI counts of  
194 all of the X-chromosome genes excluding *Xist* and fitting the model on the merged  
195 spatial profile. We visualized the significance at a region-specific level by computing  
196 and plotting z-scores in 2D (Figure 3g, Supplementary Figure S5). We found that  
197 the region significant for paternal X-chromosome expression was located precisely  
198 around the CA1, CA3, and dentate cell-type layers of the hippocampus as well as  
199 around a cluster of interneurons, and was anti-correlated with *Xist* (Figure 3h). *Xist*  
200 had fewer spatial regions reaching significance, reflecting its lower UMI coverage  
201 and thus wider confidence intervals in most areas (Supplementary Figure S9).

## 202 **spASE identifies cell type-driven spatial ASE in the autosome of** 203 **the mouse hippocampus**

204 We next investigated autosomal spatially significant genes with spatial ASE that  
205 was explained by cell type-driven ASE. Recall that several genes, including *Nrip3*  
206 and *Ptgds*, no longer possessed significant spatial ASE after controlling for cell  
207 type, indicating cell type-driven ASE. To quantify such cell type-driven ASE, we  
208 used spASE to estimate the overall maternal allele probability for each cell type,  
209 revealing several genes previously unknown to exhibit cell type-specific ASE (Figure  
210 4a). For these genes, spASE's estimated spatial ASE patterns were primarily driven  
211 by cell type localization distributions (Figure 4b-d). For example, *Nrip3*, one of the  
212 most statistically significant autosomal genes, had a high maternal bias in CA1,  
213 CA3, and dentate cell types, driving a strong maternal signal observed in the z-  
214 score plot (Figure 4b). *Ptgds*, which was highly expressed in both oligodendrocytes  
215 and endothelial tip cells, had a strong paternal bias in oligodendrocytes but not  
216 endothelial cells (Figure 4c,e). *Sst* exhibited a maternal bias which was enhanced  
217 in an interneuron subtype localizing primarily outside of the hippocampus (Figure  
218 4d; Supplementary Figure S10).

219 We examined whether this high cell type-specificity of ASE for these genes could  
220 be explained by genetic differences between the CAST (maternal) and 129 (pater-  
221 nal) mouse strains. Specifically, we investigated if a SNP could alter the binding  
222 affinity of a cell type-specific transcription factor at either the promoter or a putative  
223 enhancer. We analyzed single-cell ATAC-seq (scATAC) data from the mouse hip-  
224 pocampus [44] and searched for instances of SNPs overlapping known transcription  
225 factor binding site (TFBS) motifs in peaks within 50kb upstream and downstream of  
226 each gene (Methods). We found a peak in the promoter of *Gm35287* approximately  
227 8kb upstream of *Ptgds* (Supplementary Figure S11), which is predicted to have a  
228 TSS-distal with enhancer-like signature for *Ptgds* [45]. Furthermore, we found that  
229 this peak has a high co-accessibility ( $r^2 = 0.74$ ) with the *Ptgds* promoter peak for  
230 cell types in common between the scATAC data and our spatial data (Figure 4f).  
231 In particular, both peaks are preferentially open in oligodendrocytes. We found a  
232 SNP, rs8255993, overlapping a known transcription factor motif, PB0044.1, which  
233 corresponds to the gene *Mtf1* (Supplementary Figure S11), which is also highly ex-  
234 pressed in oligodendrocytes (Figure 4g) [43]. The SNP is A in the paternal strain  
235 and C in the maternal, and this position has a strong A signal in the TFBS position  
236 weight matrix for *Mtf1* (Figure 4h). Thus, the preferential binding of *Mtf1* to the pa-  
237 ternal allele at this distal enhancer is a likely mechanism driving the paternal bias  
238 of *Ptgds* observed in oligodendrocytes.



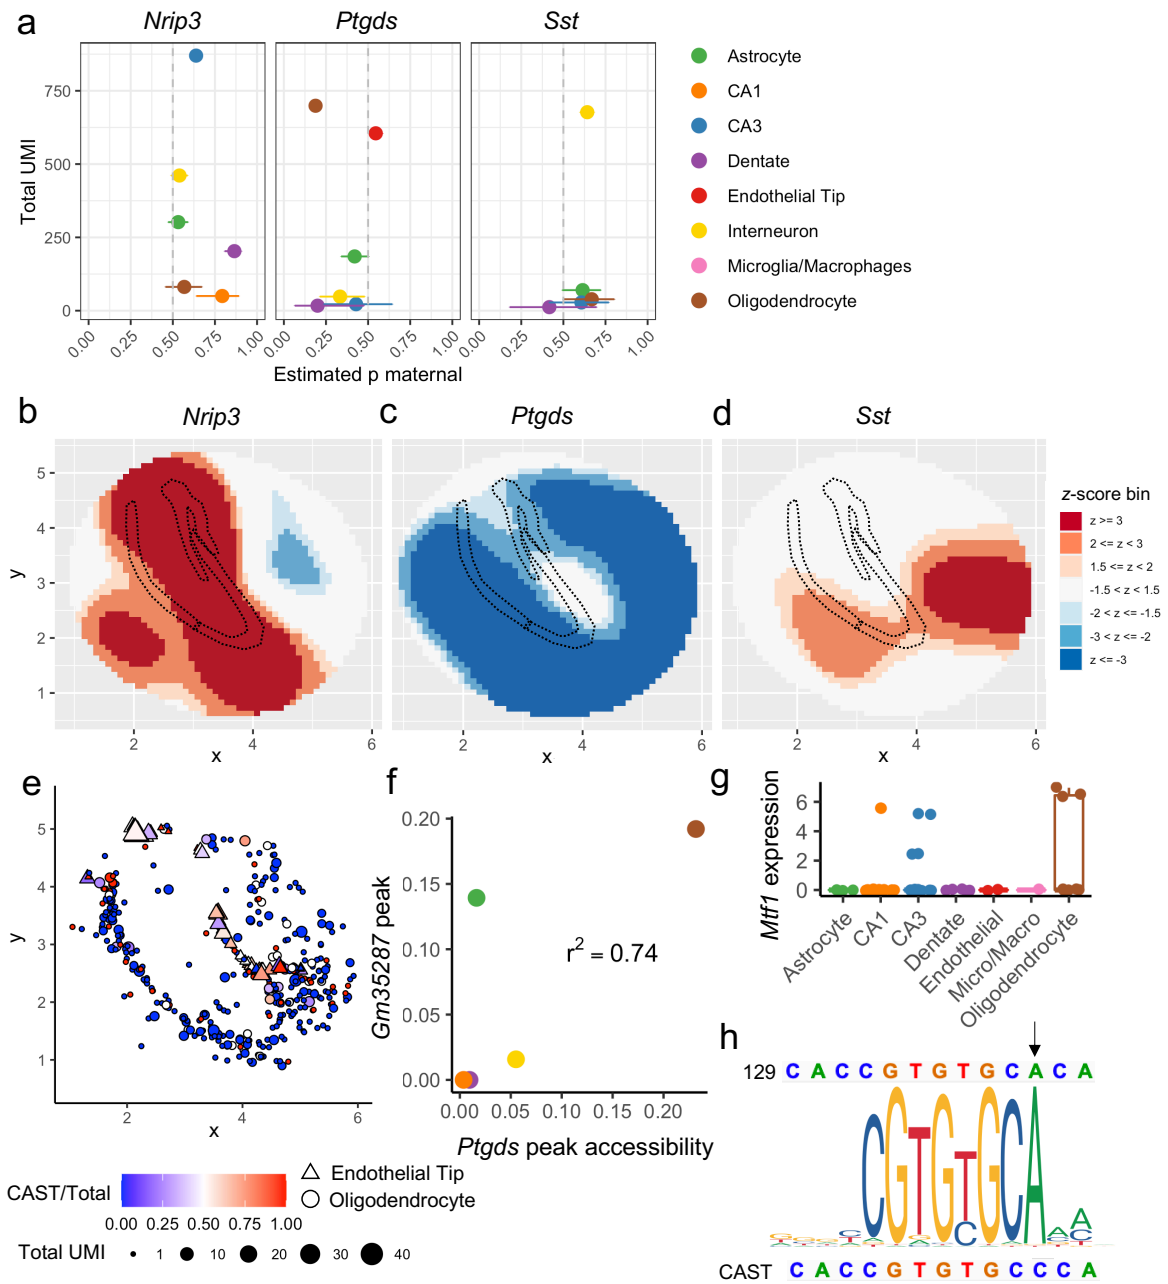

**Figure 4: spASE identifies cell type-driven spatial ASE in the autosome.** (a) MLEs and associated confidence intervals for the maternal probability  $p$  for three of the top autosomal gene hits ( $q$ -value  $\leq 0.01$ ), *Nrip3*, *Ptgd*, and *Sst*. x-axis: total UMI counts summed across all pixels. (b) 2D z-score plot for *Nrip3*. The hippocampal formation is outlined with dotted black lines. (c-d) Same as b for *Ptgd* and *Sst*, respectively. (e) Raw data for *Ptgd* for endothelial tip (triangles) and oligodendrocyte (circles) pixels. Size of the point indicates the total number of UMI present at that pixel, and color indicates the fraction of the total UMI that were from the CAST (maternal) allele. (f) Average sci-ATAC-seq peak accessibility of the *Ptgd* promoter peak and the nearby (~8kb away) peak in *Gm35287* for the cell types overlapping between the sci-ATAC-seq data set and the Slide-seq data. (g) Single-cell RNA-seq expression for *Mtf1* from the Mouse Brain Atlas [43]. Each point represents a cluster that was classified as one cell type. (h) Position weight matrix for PB0044.1 (*Mtf1*) with 129 (paternal) and CAST (maternal) reference sequences shown on the top and bottom, respectively. Black arrow points to the SNP position of interest.

## 239 Discussion

240 Allele-resolved spatial transcriptomics suffers from high sparsity in comparison to  
241 bulk and single-cell sequencing, and confounding between cell type and spatial  
242 location present further statistical challenges. Here, we describe a statistical ap-  
243 proach and software (spASE) which allows for estimating and visualizing 2D allele  
244 probabilities for sparsely expressed genes, as well as for testing spatial significance  
245 while controlling for user-specified covariates such as cell type. Through simula-  
246 tions, we demonstrate that our method maintains high power to detect ASE even  
247 with as few as 100 pixels and as low as 1 UMI per pixel for a given gene. We gen-  
248 erated Slide-seqV2 data from an F1 female CASTx129 mouse hippocampus and  
249 show that our method recovers known patterns of XCI both within and across cell  
250 type (Figure 3). We further show that our method can identify cell type-specific ASE,  
251 which if not accounted for can be confused with spatial signal (Figure 4).

252 The primary *in situ* validation of our method was in the X-chromosome, where we  
253 found the same pattern of XCI both within and across cell types for multiple genes.  
254 XCI is thought to occur early in embryonic development in female organisms, be-  
255 fore cell type differentiation [4], and the maternal and paternal chromosomes are  
256 thought to be equally likely to be inactivated. Thus, the pattern we observed in our  
257 data likely reflects randomly determined XCI in the early mouse embryo that propa-  
258 gated through to the adult hippocampus. This phenomenon can potentially explain  
259 why the X-chromosome p-value distribution was slightly but not fully affected by  
260 controlling for cell type (Figure 2b), as some nearby cell types may be derived from  
261 the same X-inactivated progenitor cell. Notably, *Tceal3* exhibited a strong paternal  
262 bias, but still had a spatial pattern that was similar to the general XCI pattern we  
263 observed in other X-chromosome genes (Supplementary Figures S5,S8). Another  
264 nearby gene, *Morf4l2*, also exhibited a paternal bias. Thus, the pattern we ob-  
265 served in *Tceal3* may be the combined result of XCI and another form of epigenetic  
266 imprinting.

267 One limitation of our spatial ASE analysis is that low UMI coverage limits the  
268 spatial resolution of ASE estimates. For example, within the XCI analysis, *Xist* was  
269 lowly expressed (Figure 3h); however, for genes with higher coverage, such as *Pip1*,  
270 it was possible to resolve the spatial ASE function further by increasing the degrees  
271 of freedom used to construct the 2D basis functions. Due to our limited spatial  
272 resolution, although we detected spatial patterns of XCI between the hippocampal  
273 formation (paternal bias) and surrounding areas (maternal bias), it is likely that in-  
274 creased statistical power would be achieved and higher-resolution spatial patterns  
275 would be uncovered given a higher-coverage dataset.

276 Similarly, although we found multiple instances of differential ASE across cell  
277 types as previously observed [20, 46], our analysis did not detect any spatial ASE  
278 in autosomal genes not explainable by cell type. We note that the statistical power  
279 was lower for the detection of spatial effects compared to the detection of cell-type  
280 differences. It is possible that autosomal spatial ASE effects might be detected  
281 given increased coverage and sample size.

282 We found that *Sst* exhibited a strong maternal bias for interneurons, particularly  
283 for a subtype located outside of the hippocampal formation with high *Sst* expression  
284 (Supplementary Figure S10). *Sst* is a well-known neuropeptide expressed through-  
285 out the brain which has been studied in the context of various neurological diseases

286 [47]. However, we were not able to detect a likely cell type-specific transcription  
287 factor with a nearby binding site that was affected by strain-specific genetic varia-  
288 tion as we did for *Ptgds*, although it is possible that the bias may only affect this  
289 subtype which is not represented in the scATAC-seq data set we used. Also, note  
290 that *Sst* exhibited low levels of expression in other cell types, which limited statistical  
291 power. Overall, these findings demonstrate that our method is broadly applicable for  
292 ASE discovery in spatial transcriptomics. Our rigorous computational approach will  
293 inform future analyses on the variability and biological mechanisms driving spatial  
294 and cell type-specific ASE.

## 295 **Methods**

### 296 **Slide-seqV2 of CAST/EiJ x 129S1/SvImJ F1 mice**

297 We obtained a female CAST/EiJ x 129S1/SvImJ (CASTx129) mouse from Jackson  
298 laboratories. The CASTx129 cross contains  $\sim 23$  million SNPs, or approximately 1  
299 SNP for every  $\sim 110$  bp [48, 49]. This SNP density is approximately tenfold the SNP  
300 density in human cells and thus provides high resolution to interrogate ASE. Slide-  
301 seqV2 was performed as described previously [21, 22] on two adjacent, 10 $\mu$ m-thick  
302 coronal slices of the hippocampus.

### 303 **Alignment of Slide-seqV2 data**

304 We generated a pooled CASTx129 transcriptome using the command `create-hybrid`  
305 from the EMASE [50] software on the CAST and 129 transcript fasta files down-  
306 loaded from <ftp://churchill-lab.jax.org/software/g2gtools/mouse/R84-REL1505/>.  
307 We then aligned 150bp reads to this pooled transcriptome with `bowtie2` [51] using  
308 the parameters `-k 4 -p 16 --very-sensitive`. We used a custom script (<https://github.com/lulizou/spASE/blob/master/scripts/processBowtie2.py>) for pro-  
309 cessing the aligned BAM file [52] to create a gene UMI count matrix only from reads  
310 that uniquely aligned to one gene and one allele. We restricted attention to align-  
311 ments with 3 or fewer mismatches and only considered alignments that had the  
312 fewest number of mismatches for that read. We overlaid data from the two slices by  
313 rotating and shifting the slices to overlap according to the location of the hippocam-  
314 pal formation.  
315

### 316 **Beta-binomial model for allele-specific expression in spatial transcriptomics**

317 Let  $n_{gi}$  denote the observed total counts of gene  $g$  at cell or pixel  $i$  and  $Y_{gi}$  denote  
318 the observed maternal allele UMI counts for gene  $g$  at cell or pixel  $i$ . Let  $\lambda_{gi}$  denote  
319 the unknown mean probability of observing a maternal allele for each transcript of  
320 gene  $g$  at pixel  $i$ . We assume  $Y_{gi}|\lambda_{gi} \sim \text{Binomial}(n_{gi}, \lambda_{gi})$ , where  $n_{gi}$  is observed  
321 and  $\lambda_{gi}$  is a random variable, independently distributed (conditional on  $\phi_g$  and  $p_{gi}$ ,  
322 defined below) for each gene  $g$  and pixel  $i$ . We further assume that  $\lambda_{gi}$  follows a  
323 beta distribution with mean  $p_{gi}$  and variance  $\phi_g p_{gi}(1 - p_{gi})$ . The likelihood of this  
324 model for a single gene  $g$  can be written as

$$\mathcal{L}(p_{gi}, \phi_g; n_{g\cdot}, y_{g\cdot}) = \prod_i \binom{n_{gi}}{y_{gi}} \frac{B(p_{gi}(1 - \phi_g)/\phi_g + y_{gi}, (1 - p_{gi})(1 - \phi_g)/\phi_g) + n_{gi} - y_{gi}}{B(p_{gi}(1 - \phi_g)/\phi_g, (1 - p_{gi})(1 - \phi_g)/\phi_g)} \quad (2)$$

325 where  $B$  denotes the beta function. We used maximum likelihood estimation to  
 326 obtain the estimates  $\hat{p}_{gi}$  and  $\hat{\phi}_g$  for each gene and the associated standard errors,  
 327 determined from the Fisher information. When using this model for single-cell data  
 328 to estimate ASE for a single gene,  $p_{gi}$  is assumed to be the same for all cells  $i$ ;  
 329 when estimating  $p_{gi}$  for spatial transcriptomics,  $p_{gi}$  is assumed to be dependent on  
 330 pixel  $i$  as described below. Assuming asymptotic normality, we used these point  
 331 estimates and standard errors to construct 95% confidence intervals for  $\hat{p}_{gi}$ . Finally,  
 332 we used the Benjamini-Hochberg [53] procedure to produce  $q$ -values to control the  
 333 false discovery rate.

334 In the spatial setting, for each gene  $g$ , we model  $p_{gi}$  as a smooth spatially-varying  
 335 function. Specifically, we used thin plate regression splines [36, 40, 41] to estimate  
 336 smooth maternal allele probability surfaces for each gene. Thin plate regression  
 337 splines allow estimation of a smooth function of 2D coordinates. The number of  
 338 basis functions  $d$  determines the smoothness, with lower values of  $d$  corresponding  
 339 to smoother functions. Choice of  $d$  depends on the sparsity of the data, since lower  
 340 values of  $d$  reduce the variance, but at the risk of introducing bias. In the analy-  
 341 sis presented here, we kept  $d$  constant across genes to ensure comparability. For  
 342 our sparse Slide-seqV2 data, we found that  $d = 10$  provided enough complexity to  
 343 model allelic patterns in the hippocampus sample examined here while also main-  
 344 taining power to detect significant differences, and we used  $d = 15$  when plotting  
 345 estimated maternal allele probability functions using all pixels. We also demonstrate  
 346 reproducibility of results (i.e. genes detected as having a significant spatial pattern)  
 347 across a range of values for  $d$  (Supplementary Tables S1-S4). In practice, we rec-  
 348 ommend visualization of the estimated probability function and confidence intervals  
 349 (e.g. Figure 2c-f) to guide selection of  $d$ .

350 In the model for cell type-specific spatial ASE detection, the term  $\theta_{gk}$  corre-  
 351 sponds to the effect size for cell type  $k$  for gene  $g$ . If no cell type annotations are  
 352 available, or if a cell type effect does not exist (see likelihood ratio test below), then  
 353  $\theta_{gk}$  can be assumed to be the same for all  $k$ .

354 To test whether there was a significant spatial pattern beyond cell type, we as-  
 355 sumed a baseline model with only cell types as covariates and performed a likeli-  
 356 hood ratio test comparing model (1) to the baseline model, i.e. for each gene  $g$ , we  
 357 compute

$$\Lambda_g = -2(\ell(\mathbf{p}_g, \phi_g; \mathbf{n}_g, \mathbf{Y}_g, \mathbf{X}) - \ell(\mathbf{p}_g, \phi_g; \mathbf{n}_g, \mathbf{Y}_g, \mathbf{X}, \mathbf{x}, \mathbf{y})) \quad (3)$$

358 where  $\ell$  is the log-likelihood computed from (1),  $\mathbf{p}_g$  is the vector of maternal proba-  
 359 bilities at each pixel  $i$  for gene  $g$ ,  $\mathbf{n}_g$  is the total number of UMIs at each pixel  $i$  for  
 360 gene  $g$ ,  $\mathbf{Y}_g$  is the total number of maternal-derived UMIs at each pixel  $i$  for gene  
 361  $g$ ,  $\mathbf{X}$  is the  $i \times k$  matrix of indicators of each cell type  $k$  at each pixel  $i$ , and  $\mathbf{x}, \mathbf{y}$   
 362 are the vectors of 2D spatial coordinates for each pixel  $i$ . This test statistic has an  
 363 asymptotic  $\chi_1^2$  distribution, which we use to compute p-values for each gene.

364 For visualization, we plotted both the estimated smooth function for the MLE  $\hat{p}_{gi}$   
 365 (Figure 3a-c) as well as 2D  $z$ -score plots (Figure 3d-e, Figure 4e).  $Z$ -score plots  
 366 were calculated on an evenly spaced grid of points over the sample by taking the

367 point estimate  $\text{logit}(\hat{p}_{gi})$  at each location and its associated standard error  $s_{gi}$  and  
368 computing  $z_{gi} = \text{logit}(\hat{p}_{gi})/s_{gi}$ .

## 369 Computational implementation

370 spASE is implemented as an R package (<https://github.com/lulizou/spase>).  
371 We generated thin plate regression splines using the R package `mgcv` [40]. Specific-  
372 ally, we used the `smoothCon` function to construct spline basis functions. As basis  
373 functions can depend on the scale of the spatial covariates, we used normalized  
374 coordinates and also normalized the basis functions after construction by subtract-  
375 ing the mean and dividing by the standard deviation. We used the implementation  
376 of the beta-binomial likelihood from the R package `aod` [54].

377 We ran spASE in multiple modes: 1) not controlling for cell type, 2) controlling for  
378 cell type by allowing each cell type to have a different intercept term, and 3) allowing  
379 for each cell type to have a different spatial pattern. For 1), we experimented with  
380 using all pixels or only pixels confidently called as single cells (singlets). We found  
381 that using all pixels allowed us to increase our power and resolution for estimation  
382 of  $p_{gi}$  and  $\phi_i$ , and for evaluating significance of spatial fits; thus, for visualization in  
383 our figures, we use all pixels, unless the figure is specifically denoted to be a single  
384 cell type. For results directly comparing to cell type models from 2) and 3), e.g.  
385 significant genes detected when controlling and not controlling for cell type, we use  
386 only pixels confidently classified in both cases to ensure comparable sample sizes  
387 of pixels.

## 388 Simulation details

389 We simulated beta-binomial count data to evaluate the power, false positive rate,  
390 and  $p$ -values calculated using spASE. For each simulated gene, to construct ran-  
391 dom spatial ASE patterns, we used a random linear combination of basis functions  
392 calculated from the pixel locations of the Slide-seqV2 hippocampus data set us-  
393 ing degrees of freedom  $d = 15$ . We first sampled a random number of total pixels  
394  $N \in \{50, 100, 250, 500\}$  and used a fixed number of UMIs per pixel. The range of  
395 average UMIs per pixel for a single gene reached up to 14 in the real Slide-seqV2  
396 hippocampus data set; for testing purposes, we used values ranging from 1 to 50.  
397 We drew the coefficients  $\theta_g$  of a random linear combination of basis functions from  
398 a standard normal distribution. Then, we chose a fixed overdispersion parameter  
399  $\phi \in \{0.1, 0.3, 0.5, 0.8\}$ , sampled the true binomial probabilities  $\lambda_{gi}$  for each pixel lo-  
400 cation  $i$  from the beta distribution, and simulated counts from the binomial model.

401 To evaluate the asymptotic confidence interval coverage properties, we simu-  
402 lated ground truth data generated under the beta-binomial model without spatial  
403 covariates under a range of values for overdispersion, total coverage, and number  
404 of cells or pixels (Supplementary Figure S2). Specifically, we tested total UMI con-  
405 ditions based on three dataset-specific distributions for total UMI for a single gene  
406 across cells or pixels: Smart-seq3, which had generally high total UMI for each  
407 cell [31]; Slide-seq high, which had low counts with a high right skew; and Slide-  
408 seq low, which had mostly low counts (less than 5 per pixel, Supplementary Figure  
409 S3). We evaluated a range of values for the total number of cells or pixels the  
410 gene was captured on. We also tested a range of overdispersion values, namely

411  $\phi \in \{0, 0.1, \dots, 1\}$ , and noticed the trend was the same as  $\phi$  increased, thus we only  
412 show results here for  $\phi = 0, 0.1, 0.8$ . We set the maternal probability at  $p = 0.5$  and  
413 simulated 5,000 iterations for each condition.

## 414 Prediction of cell types in spatial transcriptomics

415 We ran RCTD [23] to predict cell types in our Slide-seq data using a previously  
416 published single-cell RNA-seq reference for mouse hippocampus [42]. RCTD is a  
417 supervised approach that learns cell type profiles from a single cell reference and  
418 predicts cell type labels for spatial transcriptomics pixels using a Poisson log-normal  
419 model that accounts for platform effects between single-cell RNA-seq and Slide-seq  
420 data. We used a threshold of a likelihood difference of 100 between the minimum  
421 score and singlet score to classify singlets. After running RCTD, we filtered to pixels  
422 that were predicted to contain a single cell-type and added these cell type labels as  
423 the covariates in model (1) to perform all cell type-specific analyses.

## 424 Mouse hippocampus scATAC-seq, cis-regulatory elements, and TFBS motifs

425 We analyzed previously published mouse hippocampus sci-ATAC-seq count ma-  
426 trices (GSE118987) [44]. The mice used in the study were the wild-type C57/B6  
427 strain, and the data were aligned to the mm10 genome. We extracted the called  
428 peak annotations and counts using the command `scitools split`. To quantify ac-  
429 cessibility of peaks, we computed the average count within cell types. We searched  
430 for known TFBS motifs within peaks with the command `matchMotifs` from the R  
431 package `motifmatchr` [55] using all motifs for *Mus musculus* in the JASPAR 2020  
432 database [56]. We overlaid annotations of ENCODE cis-regulatory elements (cCREs)  
433 [45] for mm10 downloaded from the UCSC Table Browser [57] at the *Ptgds* locus  
434 and visualized the annotations using IGV [58].

## 435 Mouse strain SNP data

436 We obtained gene-specific SNP annotations for 129S1/SvImJ and CAST/EiJ with  
437 respect to the mm10 reference using REL1505 of the Mouse Genomes Project  
438 ([https://www.sanger.ac.uk/sanger/Mouse\\_SnpViewer/rel-1505](https://www.sanger.ac.uk/sanger/Mouse_SnpViewer/rel-1505)) [59, 60]. For each  
439 gene of interest, we searched for SNPs overlapping the gene, within 50kb upstream  
440 of the gene start, and 50kb downstream of the gene end.

## 441 Data availability

442 Slide-seqV2 data generated in this study will be made available upon publication.

## 443 Acknowledgements

444 We thank members of the Irizarry lab for helpful discussions. LSZ was supported  
445 by an NSF Graduate Research Fellowship. FC acknowledges funding from NIH  
446 DP5OD024583, R33CA246455, NIH R01HG010647, the Burroughs Wellcome CASI

447 fund, and the Searle Scholars award. RAI was supported by NIH grants R35GM131802  
448 and R01HG005220.

## 449 **Author contributions**

450 RAI, FC, and LSZ conceived of the study. TZ and EM generated the Slide-seqV2  
451 data. LSZ, RAI, DMC, FC, TZ, and MJA analyzed the data. LSZ, RAI, DMC, TZ,  
452 and FC wrote the manuscript. All authors read and approved the final manuscript.

## 453 **Competing interests**

454 The authors declare no competing interests.

## 455 **References**

- 456 [1] Ferguson-Smith, A. C. & Surani, M. A. Imprinting and the epigenetic asymme-  
457 try between parental genomes. *Science* **293**, 1086–1089 (2001).
- 458 [2] Reik, W., Dean, W. & Walter, J. Epigenetic reprogramming in mammalian  
459 development. *Science* **293**, 1089–1093 (2001).
- 460 [3] Knight, J. C. Allele-specific gene expression uncovered. *Trends Genet* **20**,  
461 113–116 (2004).
- 462 [4] Lyon, M. F. Gene action in the X-chromosome of the mouse (*Mus musculus*  
463 L.). *Nature* **190**, 372–373 (1961).
- 464 [5] Disteche, C. M. & Berletch, J. B. X-chromosome inactivation and escape. *J*  
465 *Genet* **94**, 591–599 (2015).
- 466 [6] Wu, H. *et al.* Cellular resolution maps of X-chromosome inactivation: impli-  
467 cations for neural development, function, and disease. *Neuron* **81**, 103–119  
468 (2014).
- 469 [7] Yan, H., Yuan, W., Velculescu, V. E., Vogelstein, B. & Kinzler, K. W. Allelic  
470 variation in human gene expression. *Science* **297**, 1143 (2002).
- 471 [8] Cowles, C. R., Hirschhorn, J. N., Altshuler, D. & Lander, E. S. Detection of  
472 regulatory variation in mouse genes. *Nat Genet* **32**, 432–437 (2002).
- 473 [9] Bray, N. J., Buckland, P. R., Owen, M. J. & O’Donovan, M. C. Cis-acting vari-  
474 ation in the expression of a high proportion of genes in human brain. *Hum*  
475 *Genet* **113**, 149–153 (2003).
- 476 [10] Gimelbrant, A., Hutchinson, J. N., Thompson, B. R. & Chess, A. Widespread  
477 monoallelic expression on human autosomes. *Science* **318**, 1136–1140  
478 (2007).

- 479 [11] Zwemer, L. M. *et al.* Autosomal monoallelic expression in the mouse. *Genome*  
480 *Biol* **13**, R10 (2012).
- 481 [12] Chess, A. Mechanisms and consequences of widespread random monoallelic  
482 expression. *Nat Rev Genet* **13**, 421–428 (2012).
- 483 [13] Deng, Q., Ramsköld, D., Reinius, B. & Sandberg, R. Single-cell RNA-seq re-  
484 veals dynamic, random monoallelic gene expression in mammalian cells. *Sci-*  
485 *ence* **343**, 193–196 (2014).
- 486 [14] Reinius, B. & Sandberg, R. Random monoallelic expression of autosomal  
487 genes: stochastic transcription and allele-level regulation. *Nat Rev Genet* **16**,  
488 653–664 (2015).
- 489 [15] Larsson, A. J. M. *et al.* Genomic encoding of transcriptional burst kinetics.  
490 *Nature* **565**, 251–254 (2019).
- 491 [16] Rv, P., Sundaresh, A., Karunyaa, M., Arun, A. & Gayen, S. Autosomal Clonal  
492 Monoallelic Expression: Natural or Artifactual? *Trends Genet* (2020).
- 493 [17] Lee, C., Kang, E. Y., Gandal, M. J., Eskin, E. & Geschwind, D. H. Profiling  
494 allele-specific gene expression in brains from individuals with autism spectrum  
495 disorder reveals preferential minor allele usage. *Nat Neurosci* **22**, 1521–1532  
496 (2019).
- 497 [18] Chess, A. Monoallelic Gene Expression in Mammals. *Annu Rev Genet* **50**,  
498 317–327 (2016).
- 499 [19] Pickrell, J. K. *et al.* Understanding mechanisms underlying human gene ex-  
500 pression variation with RNA sequencing. *Nature* **464**, 768–772 (2010).
- 501 [20] Kerimov, N. *et al.* A compendium of uniformly processed human gene expres-  
502 sion and splicing quantitative trait loci. *Nat Genet* **53**, 1290–1299 (2021).
- 503 [21] Rodriques, S. G. *et al.* Slide-seq: A scalable technology for measuring  
504 genome-wide expression at high spatial resolution. *Science* **363**, 1463–1467  
505 (2019).
- 506 [22] Stickels, R. R. *et al.* Highly sensitive spatial transcriptomics at near-cellular  
507 resolution with Slide-seqV2. *Nature Biotechnology* 1–7 (2020).
- 508 [23] Cable, D. M. *et al.* Robust decomposition of cell type mixtures in spatial tran-  
509 scriptomics. *Nat Biotechnol* 1–10 (2021).
- 510 [24] Knowles, D. A. *et al.* Allele-specific expression reveals interactions between  
511 genetic variation and environment. *Nat Methods* **14**, 699–702 (2017).
- 512 [25] Fan, J. *et al.* ASEP: Gene-based detection of allele-specific expression across  
513 individuals in a population by RNA sequencing. *PLOS Genetics* **16**, e1008786  
514 (2020).
- 515 [26] Santoni, F. A. *et al.* Detection of Imprinted Genes by Single-Cell Allele-Specific  
516 Gene Expression. *Am J Hum Genet* **100**, 444–453 (2017).



- 517 [27] Choi, K., Raghupathy, N. & Churchill, G. A. A Bayesian mixture model for the  
518 analysis of allelic expression in single cells. *Nature Communications* **10**, 5188  
519 (2019).
- 520 [28] Zitovsky, J. P. & Love, M. I. Fast effect size shrinkage software for beta-binomial  
521 models of allelic imbalance. *F1000Research* (2020).
- 522 [29] Kim, J. K. & Marioni, J. C. Inferring the kinetics of stochastic gene expression  
523 from single-cell RNA-sequencing data. *Genome Biology* **14**, R7 (2013).
- 524 [30] Jiang, Y., Zhang, N. R. & Li, M. SCALE: modeling allele-specific gene expres-  
525 sion by single-cell RNA sequencing. *Genome Biology* **18**, 74 (2017).
- 526 [31] Larsson, A. J. M. *et al.* Transcriptional bursts explain autosomal random  
527 monoallelic expression and affect allelic imbalance. *PLOS Computational Bi-*  
528 *ology* **17**, e1008772 (2021).
- 529 [32] McCullagh, P. & Nelder, J. *Generalized Linear Models, 2nd Edition* (Chapman  
530 and Hall, 1989).
- 531 [33] Agresti, A. *Categorical Data Analysis, 3rd Edition* (Wiley, 2012).
- 532 [34] Reinsch, C. H. Smoothing by spline functions. *Numer. Math.* **10**, 177–183  
533 (1967).
- 534 [35] Wahba, G. Smoothing noisy data with spline functions. *Numer. Math.* **24**,  
535 383–393 (1975).
- 536 [36] Duchon, J. Splines minimizing rotation-invariant semi-norms in Sobolev  
537 spaces. In Schempp, W. & Zeller, K. (eds.) *Constructive Theory of Functions*  
538 *of Several Variables*, Lecture Notes in Mathematics, 85–100 (Springer, Berlin,  
539 Heidelberg, 1977).
- 540 [37] Craven, P. & Wahba, G. Smoothing noisy data with spline functions. *Numer.*  
541 *Math.* **31**, 377–403 (1978).
- 542 [38] Hastie, T. & Tibshirani, R. Generalized Additive Models. *Statistical Science* **1**,  
543 297 – 310 (1986).
- 544 [39] Chambers, J. & Hastie, T. *Statistical Models in S* (Wadsworth & Brooks/Cole,  
545 1992).
- 546 [40] Wood, S. Fast stable restricted maximum likelihood and marginal likelihood  
547 estimation of semiparametric generalized linear models. *Journal of the Royal*  
548 *Statistical Society* **73**, 3–36 (2011).
- 549 [41] Wood, S. N. Thin plate regression splines. *Journal of the Royal Statistical*  
550 *Society: Series B (Statistical Methodology)* **65**, 95–114 (2003).
- 551 [42] Saunders, A. *et al.* Molecular Diversity and Specializations among the Cells of  
552 the Adult Mouse Brain. *Cell* **174**, 1015–1030.e16 (2018). Publisher: Elsevier.
- 553 [43] Yao, Z. *et al.* A taxonomy of transcriptomic cell types across the isocortex and  
554 hippocampal formation. *Cell* **184**, 3222–3241.e26 (2021).

- 555 [44] Sinnamon, J. R. *et al.* The accessible chromatin landscape of the murine  
556 hippocampus at single-cell resolution. *Genome Res.* **29**, 857–869 (2019).
- 557 [45] Moore, J. E. *et al.* Expanded encyclopaedias of DNA elements in the human  
558 and mouse genomes. *Nature* **583**, 699–710 (2020).
- 559 [46] GTEx Consortium. The GTEx Consortium atlas of genetic regulatory effects  
560 across human tissues. *Science* **369**, 1318–1330 (2020).
- 561 [47] Song, Y.-H., Yoon, J. & Lee, S.-H. The role of neuropeptide somatostatin in the  
562 brain and its application in treating neurological disorders. *Exp Mol Med* **53**  
563 (2021).
- 564 [48] Gendrel, A.-V. *et al.* Developmental dynamics and disease potential of random  
565 monoallelic gene expression. *Dev Cell* **28**, 366–380 (2014).
- 566 [49] Xu, J. *et al.* Landscape of monoallelic DNA accessibility in mouse embryonic  
567 stem cells and neural progenitor cells. *Nat Genet* **49**, 377–386 (2017).
- 568 [50] Raghupathy, N. *et al.* Hierarchical analysis of RNA-seq reads improves the  
569 accuracy of allele-specific expression. *Bioinformatics* **34**, 2177–2184 (2018).
- 570 [51] Langmead, B. & Salzberg, S. L. Fast gapped-read alignment with Bowtie 2.  
571 *Nat Methods* **9**, 357–359 (2012).
- 572 [52] Li, H. *et al.* The Sequence Alignment/Map format and SAMtools. *Bioinformatics*  
573 **25**, 2078–2079 (2009).
- 574 [53] Benjamini, Y. & Hochberg, Y. Controlling the False Discovery Rate: A Practical  
575 and Powerful Approach to Multiple Testing. *Journal of the Royal Statistical*  
576 *Society: Series B (Methodological)* **57**, 289–300 (1995).
- 577 [54] Lesnoff, M., Lancelot & R. *aod: Analysis of Overdispersed Data* (2012). R  
578 package version 1.3.1.
- 579 [55] Schep, A. *motifmatchr: Fast Motif Matching in R* (2021). R package version  
580 1.14.0.
- 581 [56] Fornes, O. *et al.* JASPAR 2020: update of the open-access database of tran-  
582 scription factor binding profiles. *Nucleic Acids Research* **48**, D87–D92 (2020).
- 583 [57] Karolchik, D. *et al.* The UCSC Table Browser data retrieval tool. *Nucleic Acids*  
584 *Res* **32**, D493–496 (2004).
- 585 [58] Robinson, J. T. *et al.* Integrative genomics viewer. *Nat Biotechnol* **29**, 24–26  
586 (2011).
- 587 [59] Keane, T. M. *et al.* Mouse genomic variation and its effect on phenotypes and  
588 gene regulation. *Nature* **477**, 289–294 (2011).
- 589 [60] Yalcin, B. *et al.* Sequence-based characterization of structural variation in the  
590 mouse genome. *Nature* **477**, 326–329 (2011).

591 **Supplementary information**

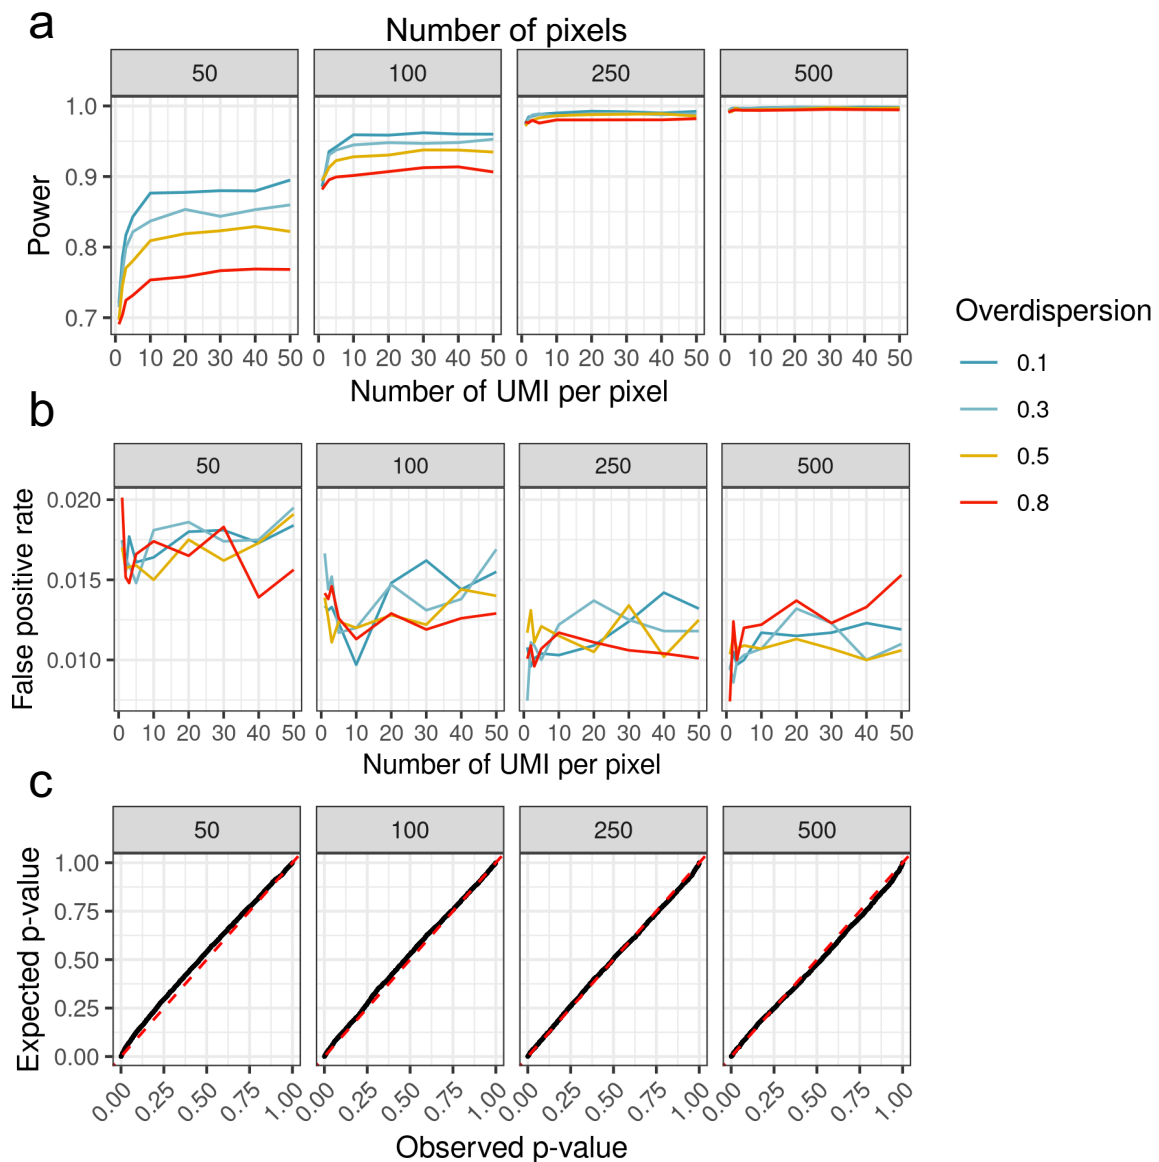

**Figure S1: Spatial transcriptomic simulation results.** (a) Power as function of number of pixels and number of UMI per pixel. x-axis is number of UMIs per pixel. Numbers in the gray panels indicate the number of total pixels. Curves are colored by the amount of overdispersion ( $\phi$ ) in the true model. (b) False positive rate as a function of number of pixels and number of UMI per pixel. (c) Expected  $p$ -values generated under a Uniform(0,1) distribution vs. observed  $p$ -values computed by spASE for the null case of no spatial ASE.

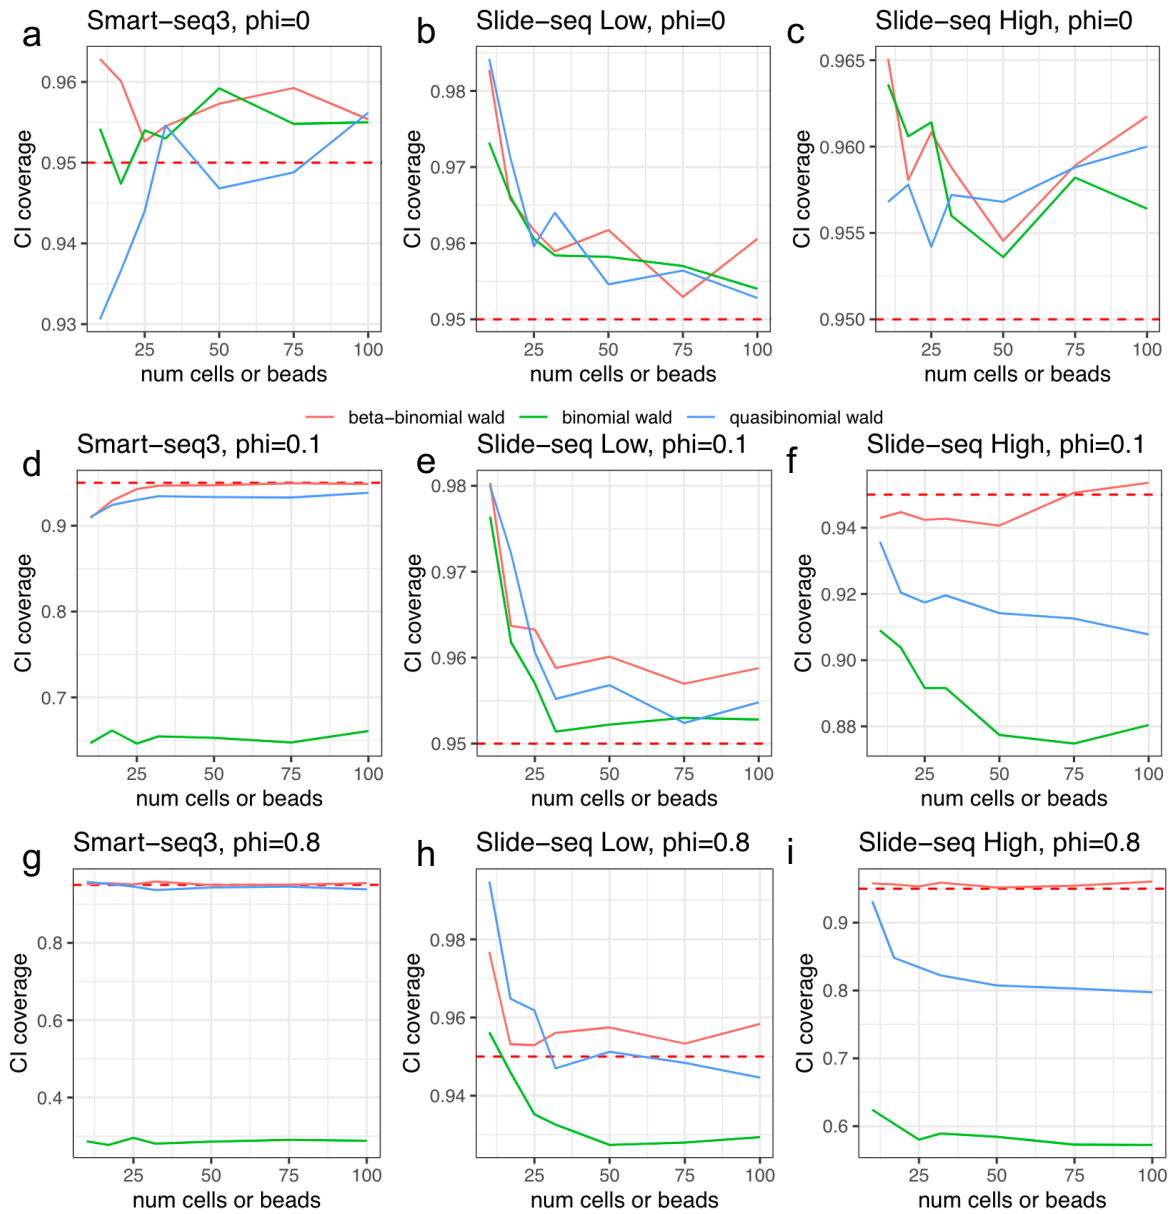

**Figure S2: Simulation results for beta-binomial coverage probabilities as compared to the binomial and quasibinomial models.** Data was generated from a beta-binomial model where each cell or bead had a total UMI count drawn from the total UMI count distribution from one of three settings, Smart-seq3 (a,d,g), Slide-seq lowly expressed gene (b,e,h), or Slide-seq highly expressed gene (c,f,i). We also tested a range of values for overdispersion ( $\phi$ ): 0 (a,b,c), 0.1 (d,e,f) and 0.8 (g,h,i).

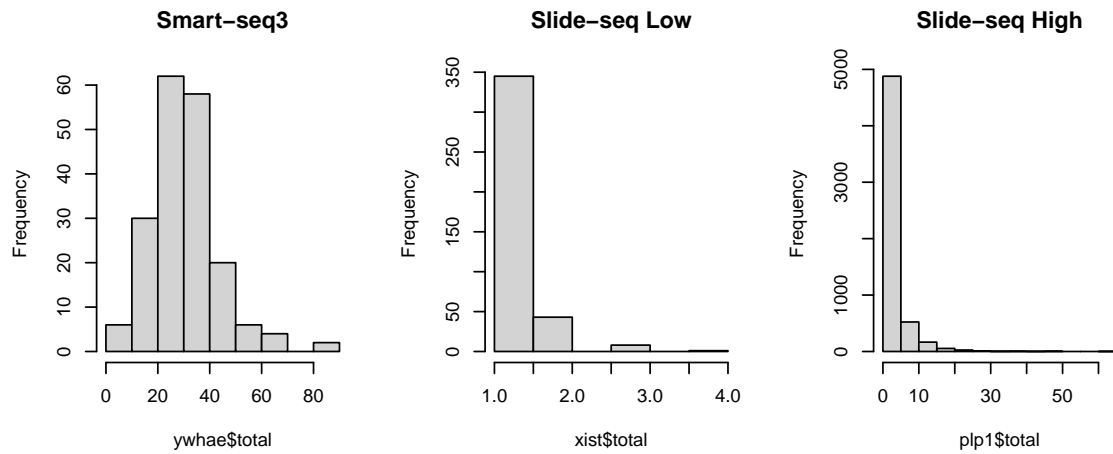

**Figure S3: Total coverage distribution scenarios used for confidence interval coverage simulations shown in Figure S1.** These were taken from genes to represent different sampling distributions for  $n_{gi}$ , the total number of UMI per gene per cell (or pixel).

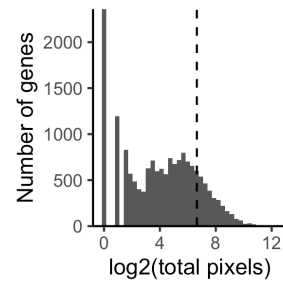

**Figure S4: Histogram of total pixels that each gene had non-zero UMI counts for.** The filtering threshold of 100 pixels per gene is shown with the dashed black line.

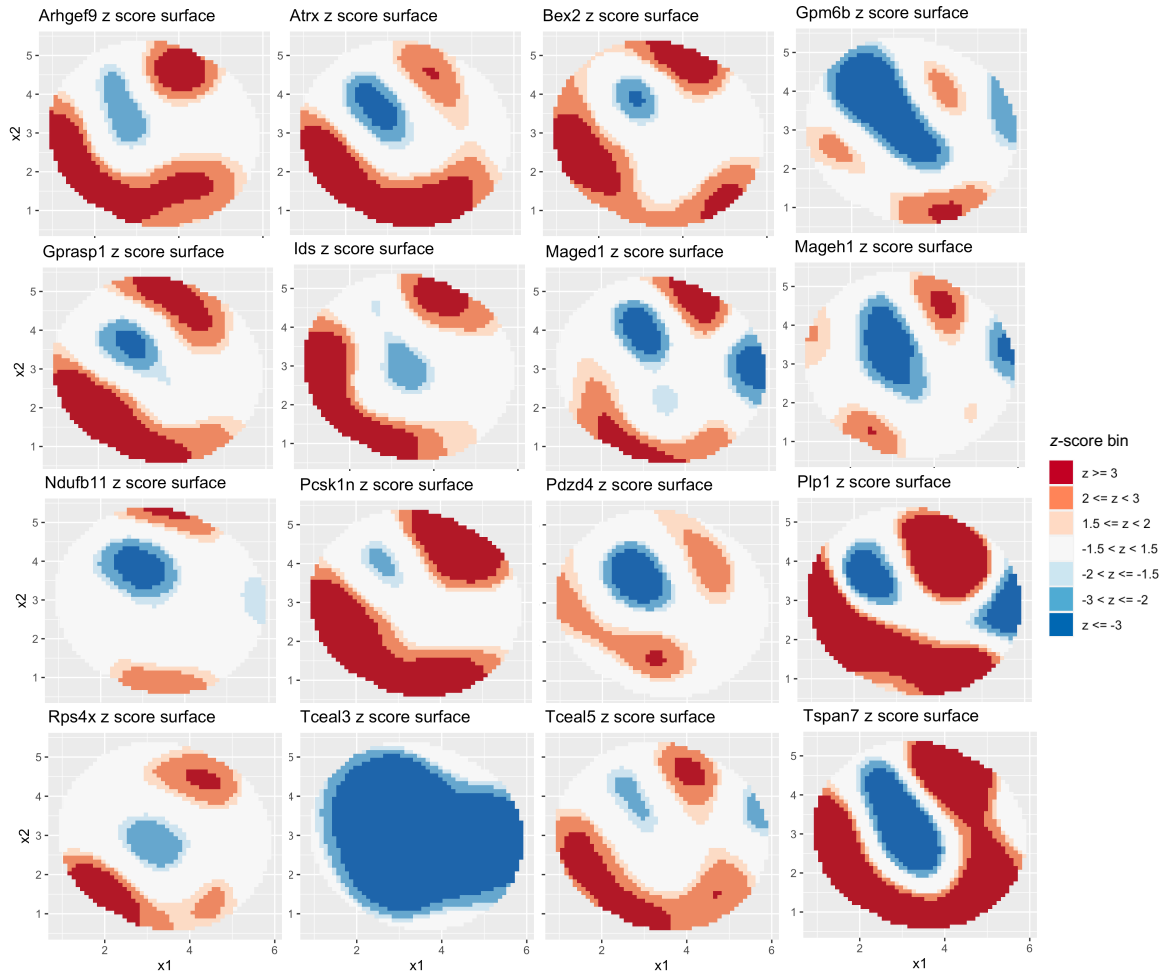

**Figure S5: 2D  $z$ -score plots for a sample of 16 highly expressed X-chromosome genes.** Red color indicates bias towards the maternal (CAST) allele; blue indicates bias towards the paternal (129) allele.

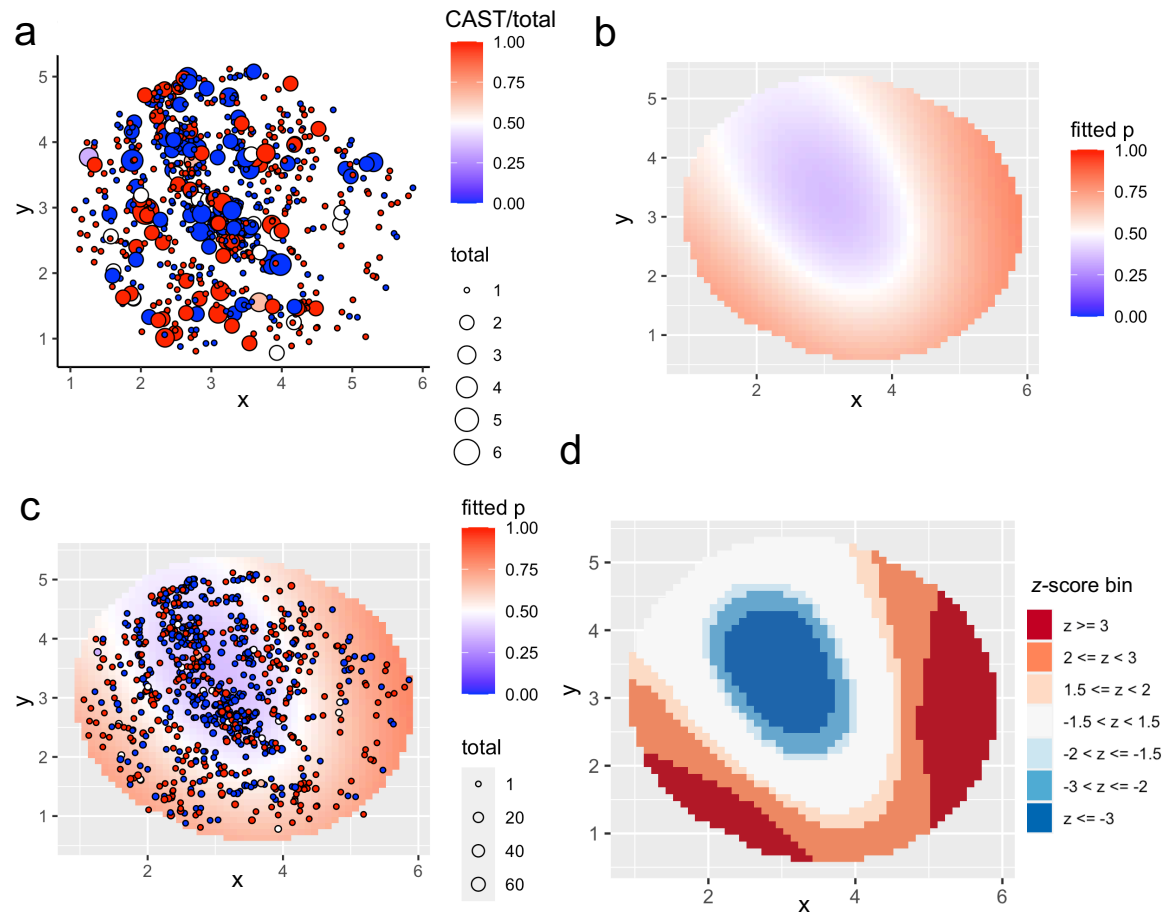

**Figure S6: Within-astrocyte ASE for *Tspan7*.** (a) Raw data for astrocyte singlets plotted using 2D coordinates for each pixel. The size of the point indicates the total UMI count for the gene *Tspan7* at that pixel. The color indicates the fraction of total UMIs that were from the maternal (CAST) allele. (b) Smoothed 2D maternal allele probability function (fitted p), estimated from the raw data shown in a using 5 degrees of freedom. (c) Overlay of data from a on the smoothed surface in b. (d) 2D z-score plot generated for the smoothed surface shown in b.



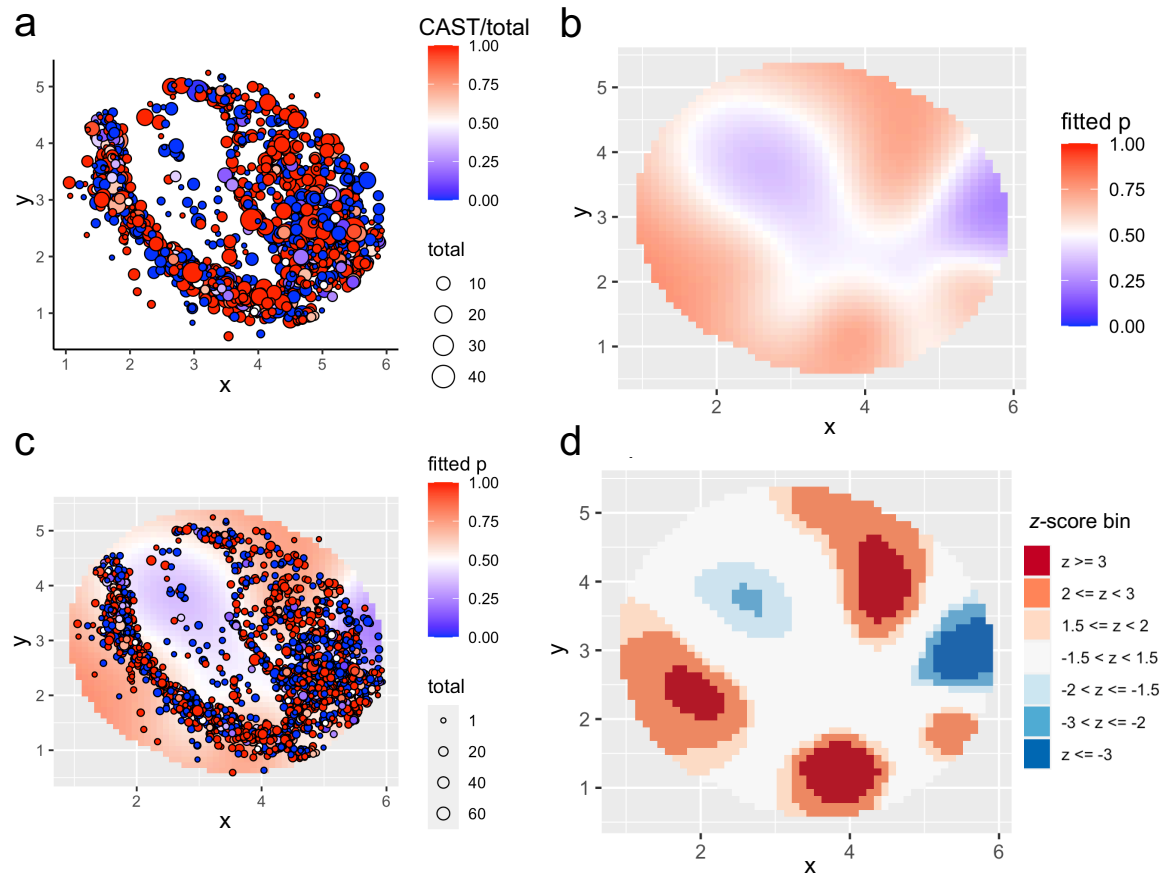

**Figure S7: Within-oligodendrocyte ASE for *Plp1*.** (a) Raw data plotted using 2D coordinates for each pixel. The size of the point indicates the total UMI count at that pixel. The color indicates the fraction of total UMIs that were from the maternal (CAST) allele. (b) Smoothed 2D maternal allele probability function (fitted p), estimated from the raw data shown in a. (c) Overlay of data from a on the smoothed surface in b. (d) 2D z-score plot generated for the smoothed surface shown in b.

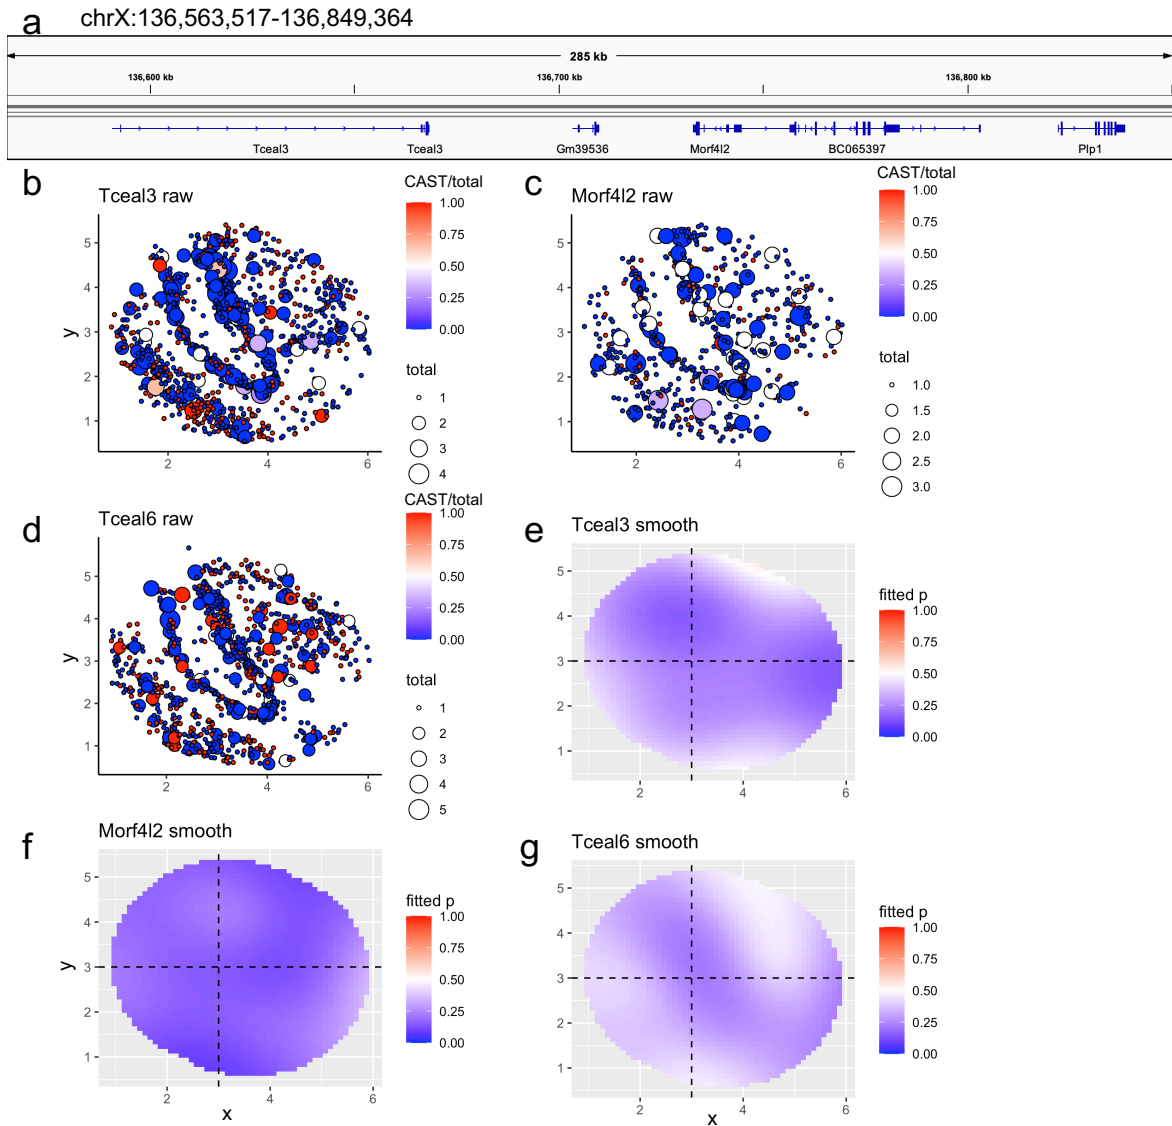

**Figure S8: X-chromosome genes detected with a paternal bias.** (a) IGV view of the *Tceal3* locus (coordinates are mm10). (b) Raw data for *Tceal3*, which was detected as having a significant spatial pattern ( $q \leq 0.01$ ). (c-d) Same as b for *Morf4l2* and *Tceal6*, which did not have a significant spatial pattern, but had paternal bias. (e-g) Smoothed maternal probability functions for *Tceal3*, *Morf4l2*, and *Tceal6*, respectively.

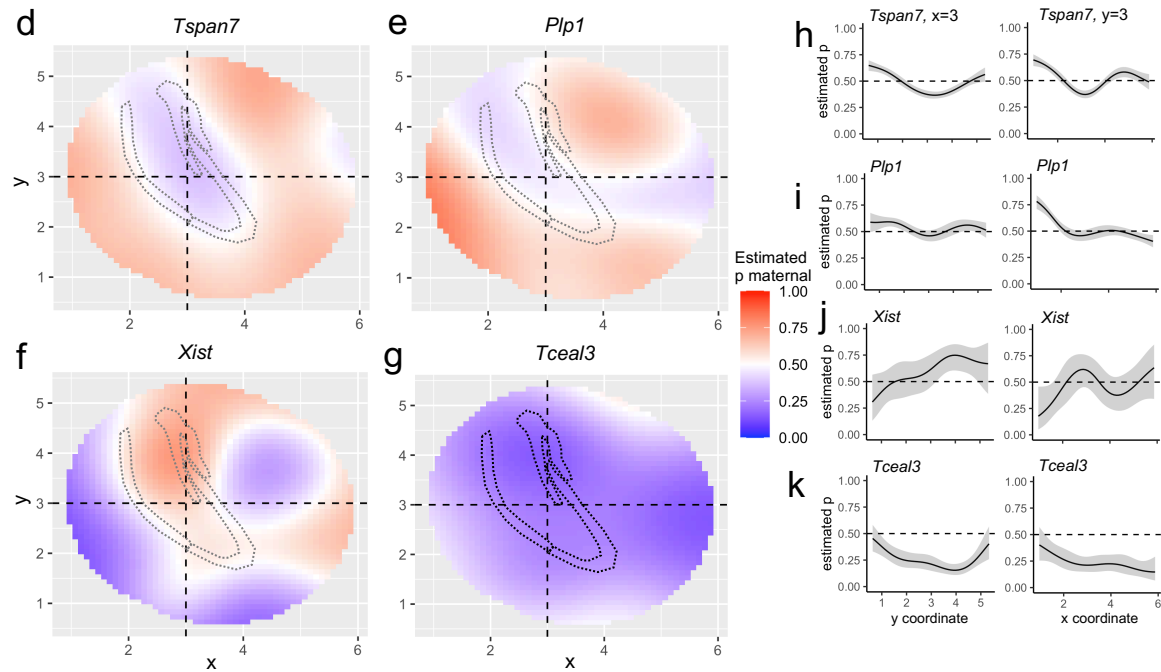

**Figure S9: Confidence interval visualization for genes displayed in Figure 3.** (a-d) Estimated maternal probability functions for *Tspan7*, *Plp1*, *Xist*, and *Tceal3* as shown in Figure 3. (e-h) Confidence interval visualizations in cross-sections along the  $x = 3$  and  $y = 3$  lines for each gene shown in a-d.

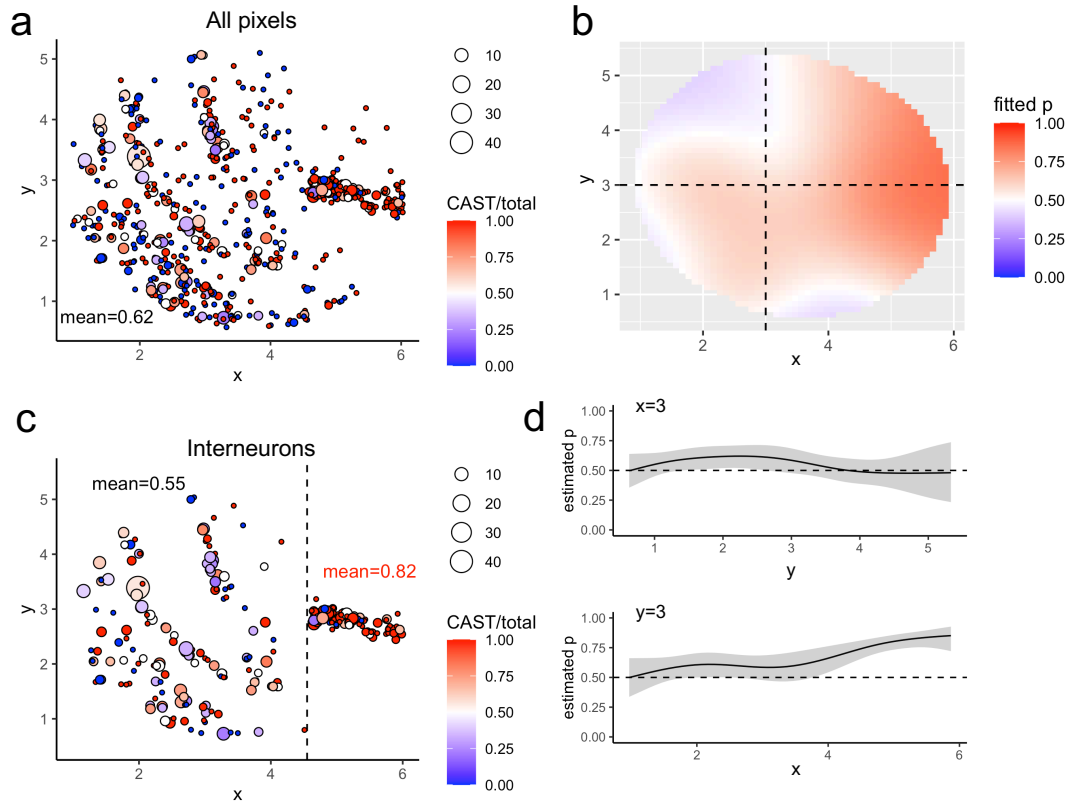

**Figure S10: Interneuron ASE for *Sst*.** (a) Raw data for each non-zero measurement pixel; color indicates fraction of total UMI that were maternal for each pixel, size of point indicates total UMI for that pixel. (b) Smoothed maternal allele probability surface. (c) Raw data for only interneuron singlets. Average expression for each boxed region is shown. (d) Confidence intervals from cross-hair slices in b.

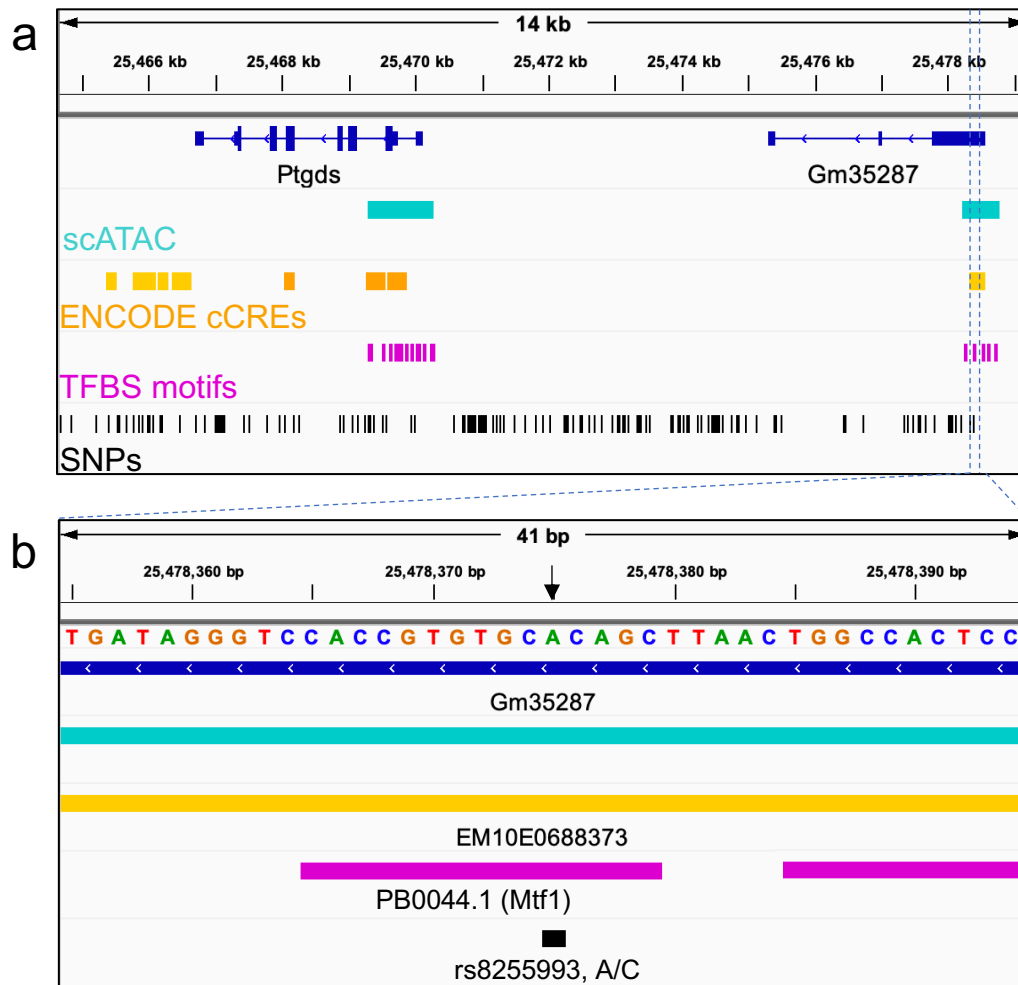

**Figure S11: *Ptgds* locus with annotations.** (a) IGV view (mm10) of the *Ptgds* locus showing the upstream *Gm35287* locus. Dark blue indicates Refseq gene annotation, cyan indicates peaks called from sci-ATAC-seq data from the mouse hippocampus, yellow denotes cis-regulatory elements (cCREs) from the ENCODE database (lighter yellow indicates distal-TSS enhancer-like signatures, darker yellow indicates proximal-TSS enhancer like signatures), magenta indicates predicted transcription factor binding site motifs within sci-ATAC-seq peaks, black indicates SNP locations for the CAST/EiJ and 129S1/SvmJ strains relative to mm10. (b) Zoomed-in genome browser view of the PB0044.1 motif (*Mtf1* gene) located in the peak overlapping *Gm35287*.

Table S1: Genes detected as spatially significant ( $q$ -value  $\leq 0.01$ ) in Slide-seqV2 of the mouse hippocampus, not controlling for cell type, degrees of freedom  $d = 10$ , restricting to pixels with a confident singlet classification by RCTD.

|    | Gene   | Total UMI | $\chi^2$ $p$ -value | $q$ -value | X-chr |
|----|--------|-----------|---------------------|------------|-------|
| 1  | Ptgds  | 1584      | 0.00e+00            | 0.00e+00   | FALSE |
| 2  | Tspan7 | 4744      | 0.00e+00            | 0.00e+00   | TRUE  |
| 3  | Plp1   | 12850     | 3.33e-16            | 4.53e-13   | TRUE  |
| 4  | Nrip3  | 1963      | 8.39e-11            | 8.56e-08   | FALSE |
| 5  | Sst    | 837       | 2.45e-07            | 2.00e-04   | FALSE |
| 6  | Pcsk1n | 1523      | 3.83e-07            | 2.60e-04   | TRUE  |
| 7  | Rgs4   | 679       | 4.02e-06            | 2.34e-03   | FALSE |
| 8  | Atrx   | 1096      | 5.37e-06            | 2.74e-03   | TRUE  |
| 9  | Mageh1 | 362       | 9.04e-06            | 4.10e-03   | TRUE  |
| 10 | Gpm6b  | 1601      | 2.07e-05            | 8.44e-03   | TRUE  |

Table S2: Genes detected as spatially significant ( $q$ -value  $\leq 0.01$ ) in Slide-seqV2 of the mouse hippocampus, not controlling for cell type,  $d = 5$ , restricting to pixels with a confident singlet classification by RCTD.

|   | Gene   | Total UMI | $\chi^2$ $p$ -value | $q$ -value | X-chr |
|---|--------|-----------|---------------------|------------|-------|
| 1 | Tspan7 | 4744      | 8.30e-14            | 3.41e-10   | TRUE  |
| 2 | Nrip3  | 1963      | 4.82e-11            | 6.60e-08   | FALSE |
| 3 | Ptgds  | 1584      | 4.18e-11            | 6.60e-08   | FALSE |
| 4 | Sst    | 837       | 4.19e-09            | 4.31e-06   | FALSE |
| 5 | Rgs4   | 679       | 6.43e-07            | 5.29e-04   | FALSE |
| 6 | Lypd1  | 241       | 1.40e-05            | 9.61e-03   | FALSE |

Table S3: Genes detected as spatially significant ( $q$ -value  $\leq 0.01$ ) in Slide-seqV2 of the mouse hippocampus, not controlling for cell type,  $d = 15$ .

|   | Gene   | Total UMI | $\chi^2$ $p$ -value | $q$ -value | X-chr |
|---|--------|-----------|---------------------|------------|-------|
| 1 | Plp1   | 12850     | 0.00e+00            | 0.00e+00   | TRUE  |
| 2 | Ptgds  | 1584      | 0.00e+00            | 0.00e+00   | FALSE |
| 3 | Tspan7 | 4744      | 0.00e+00            | 0.00e+00   | TRUE  |
| 4 | Nrip3  | 1963      | 4.89e-11            | 4.92e-08   | FALSE |
| 5 | Gstm7  | 326       | 1.51e-06            | 1.14e-03   | FALSE |
| 6 | Pcsk1n | 1523      | 1.70e-06            | 1.14e-03   | TRUE  |
| 7 | Sst    | 837       | 3.05e-06            | 1.76e-03   | FALSE |
| 8 | Gpm6b  | 1601      | 4.94e-06            | 2.49e-03   | TRUE  |



Table S4: Genes detected as spatially significant ( $q$ -value  $\leq 0.01$ ) in Slide-seqV2 of the mouse hippocampus, not controlling for cell type,  $d = 20$ .

|   | Gene   | Total UMI | $\chi^2$ $p$ -value | $q$ -value | X-chr |
|---|--------|-----------|---------------------|------------|-------|
| 1 | Ptgds  | 1584      | 0.00e+00            | 0.00e+00   | FALSE |
| 2 | Tspan7 | 4744      | 0.00e+00            | 0.00e+00   | TRUE  |
| 3 | Nrip3  | 1963      | 1.38e-10            | 1.80e-07   | FALSE |
| 4 | Gpm6b  | 1601      | 1.08e-07            | 9.42e-05   | TRUE  |
| 5 | Pcsk1n | 1523      | 1.21e-07            | 9.42e-05   | TRUE  |
| 6 | Gstm7  | 326       | 4.06e-06            | 2.63e-03   | FALSE |
| 7 | Magt1  | 127       | 8.99e-06            | 5.00e-03   | TRUE  |
| 8 | H1f2   | 105       | 1.66e-05            | 8.10e-03   | FALSE |
